# Supplementary material for: An Integrated Approach to Identify New Anti-Filarial Leads to Treat River Blindness, a Neglected Tropical Disease
Source: Pathogens. 2021 Jan 14;10(1):71. doi: 10.3390/pathogens10010071 (PMC7830784; doi:10.3390/pathogens10010071)
Supplement: Supplementary file 1 [file pathogens-10-00071-s001.xlsx]

## Sheet: Table 1 FINAL
	Drug common name		Compound class	Compound subclass	Literature targets (not all are listed)	Brugia pahangi (adult female)
						% Motility inhibition (10 μM)	IC50 (μM)
	Group A	Econazole	Imidazole	Benzyl ether	Sterol 14-demethylase / K+ VGIC 74	99.5964	4
		Miconazole	Imidazole	Benzyl ether	Sterol 14-demethylase / K+ VGIC 74	95.514	3.3
		Sulconazole	Imidazole	Thiobenzyl ether	Sterol 14-demethylase75	98.2595	4.6
		Sertaconazole	Imidazole	Benzothiophene	Sterol 14-demethylase76	99.8453	-
		Clotrimazole	Imidazole	Triphenylmethane	Sterol 14-demethylase / K+ VGIC77	85.3076	5.5
		Itraconazole	Triazole	Piperazinyl	XIAP / K+ VGIC 78,79	79.7428	-
	Group B	Suloctidil	Amino alcohol	Phenyl thioether	K+ VGIC / thyroid receptor54,55	98.6689	3.7
		Pimozide	Benzimidazolone	Piperidine	DRD2/DRD3 (GPCRs) / KCNH2 / Calmodulin56-58	96.0492	2.5
		Butamben	Benzoic ester	Aniline	VGICs59	66	-
		Clemizole	Benzimidazole	Pyrrolidine	HRH1 / K+ VGIC / NR ROR-gamma60,61	78.2875	6.5
		Proroxan	Phenyl ketone	Phenyl pyrrolidine	Adrenergic receptors62	65.1518	8.53333
		Saccharin	Benzoisothiazolone	Sulfonyl amide	carbonic anhydrase63	57	-
		Ritonavir	Amino alcohol	Peptidomimetic	HIV protease / CYP3A / SLC4764-66	51.9074	-
		Nifenazone	Dihydropyrazole	Nicotinamide	-	49.6025	-
		Levonordefrin	Amino alcohol	Phenol	ADRA2 / HADH2 / TF HIF1A / APE167,68	53.5591	-
		Tafenoquine	Quinoline	Alkyl amine	cytochrome c reductase69	63.0867	14.1
		Primaquine	Quinoline	Alkyl amine	quinone reductase70,71	51	5.1
		Apomorphine	Aporphine	Tetrahydroisoquinoline	Dopamine / serotonin / adrenergic receptor agonist72,73	53	-
		Controls: negative is media+1% DMSO (0% inhibition of motility) and Positive is 10uM auranofin (100% inhibition of motility).

## Sheet: Table 2 FINAL
	Drug common name		Day 3 adult female B. pahangi		Day 7 adult female O. ochengi		Day 5 adult male O. ochengi		Day 28 O. volvulus L5		Day 5 Loa loa mf
			% Inhibition of motility (10 μM)	IC50 (μM)	% Inhibition of viability (10 μM)	IC50 (μM)	% Inhibition of motility (10 μM)	IC50 (μM)	% Inhibition of motility (10 μM)	IC50 (μM)	% Inhibition of motility (10 μM)	IC50 (μM)
	Group A	Isoconazole	100	3.8	57	30.8	100	0.55	96	2.4	33.3	10
		Fenticonazole	100	1.154	32	94.65	75	10.61	83	4.7	50	10
		Sertaconazole	100	-	21	-	31	-	-	-	-	-
		Econazole	100	4	22	-	26	-	-	-	-	-
		Tioconazole	99	3.2	14	-	100	-	-	-	-	-
		Sulconazole	98	4.6	26	-	99	-	-	-	-	-
		Miconazole	96	3.3	0	-	100	-	-	-	-	-
		Clotrimazole	85	5.5	8	-	100	-	-	-	-	-
		Posaconazole	82	0.1	38	>100	79	6.1	57*	-	-	-
		Itraconazole	80	-	13	-	21	-	-	-	-	-
	Group B	Suloctidil	98.6689	3.7	86.6667	4.1	100	5.5	100**	-	100	4.1
		Pimozide	96.0492	2.5	12.5	-	95.835	-	-	-	-	-
		Primaquine	51	5.1	100	1.33	100	0.4	100**	-	50	18.52
		* Screen was done at 1 μM.
		-, not tested
		** 100% effective on day 21

## Sheet: Table 3 FINAL
	Aspartyl protease inhibitors (APIs)	% Inhibition of motility (30 µM)				% inhibition of molting (L3 to L4)
		B. pahangi	O. ochengi		O. volvulus	O. volvulus (day 6)
		Female (day 6)	Female (day 7)**	Male (day 5)	L4 (day 7)	3 μM	10 μM
	Nelfinavir	99	100	100	73	50.2	45.5
	Lopinavir	98	0	88	56	0	74.1
	Ritonavir	52*	63	100	0	0	0
	Pepstatin A	0	50	100	0	0	40
	Darunavir	0	30	ND	4.4	43.9	46.7
	Aliskiren	0	6	ND	0	30.4	51.7
	Amprenavir	24	0	17	8	0	43.5
	Atazanavir	11	42	ND	30	0	0
	* Screen was done at 10 μM; ** % viability inhibition.

## Sheet: Table S1 FINAL
Supplementary Table S1: Motility inhibition percentage values and IC50 values for the primary screening against Brugia pahangi.
Compound name	UCSF SMDC ID	Brugia % motility inhibition (Day 3)	Brugia Day 3 IC50 (μM)
dichlorophene, DICHLOROPHEN	FDA130499	99.9224
Lercanidipine	FDA957610	99.8851
Auranofin	FDA285624	99.8482	0.7
Sertaconazole nitrate	FDA915036	99.8453
hexetidine	FDA130288	99.8363
Niclosamide Analog #1 N-(2-chloro-4-nitrophenyl)-2-hydroxybenzamide	ChemBridge5401798	99.8336	2.6
thimerosal	FDA130956	99.8187	0.406
sorafenib p-toluensulfonate	FDA914977	99.7471
salinomycin, sodium	FDA129926	99.7124	0.6347
econazole nitrate	FDA131151	99.5964	3.965
pyrithione zinc	FDA735729	99.5281	0.09633
Tetrahydropyrvinium (THP)	SMDC755851	99.5101	0.0033
tioconazole	FDA735884	99.4699	3.182
phenylmercuric acetate	FDA130490	99.3888	0.1791
methylene blue	FDA255764	99.3659	1.059
thonzonium bromide	FDA756848	99.2819	1.07
Tizoxanide	Tizoxanide	98.9536	3.4
menadione	FDA131230	98.8722	4.227
suloctidil	FDA131132	98.6689	3.658
Nitazoxanide Analog #1 3,4-diethoxy-N-(5-nitro-1,3-thiazol-2-yl)benzamide	ChemBridge5734630	98.5768	3
Calcium acetate	FDA955216	98.4653
sulconazole nitrate	FDA131127	98.2595	4.615
methylbenzethonium chloride	FDA131332	97.4238	3.456
niclosamide, NICLOSAMIDE	FDA130212	97.1698	1.1665
perhexiline maleate	FDA129887	97.1108	7.457
isradipine	FDA130135	97.0641	2.746
benzalkonium chloride	FDA131363	96.9768	1.9
Pimozide	FDA130109	96.0492	2.517
atovaquone	FDA131510	95.9048	4.155
pyrvinium pamoate	FDA130921	95.7616	0.000316625
miconazole nitrate	FDA130708	95.514	3.3
Sanguinarine chloride, SANGUINARINE SULFATE	FDA130066	95.228	6.084
ciclopirox olamine	FDA130032	95.1389	0.2868
hexachlorophene	FDA130837	95.1351	1.7
securinine	FDA255957	94.954
gentian violet	FDA130828	93.8502	0.3
cetylpyridinium chloride	FDA130015	93.7359	3.4
oxyquinoline, OXYQUINOLINE SULFATE	FDA130732	93.6738	1.5
alexidine hydrochloride	FDA130116	92.82
acriflavinium hydrochloride	FDA130652	92.5832	4.617
monensin sodium (monensin a is shown)	FDA131183	91.623	4.658
Posaconazole	FDA957927	91.261
benzethonium chloride	FDA129994	90.516	1.4
Formoterol	FDA285796	89.8699
proflavine hemisulfate	FDA733075	88.8462
nonoxynol-9	FDA756780	88.7159	3.237
proscillaridin	FDA756888	87.9222	0.7307
docusate sodium	FDA756919	87.8446	0.2944
broxyquinoline	FDA130655	87.6737
iodoquinol	FDA130855	87.5673	1.9
tolonium chloride	FDA757032	87.3029
tranylcypromine	FDA255659	87.1349	6.15
homidium bromide	FDA131380	86.673	5.426
cloxyquin	FDA130755	86.3585	4.9
clotrimazole	FDA131180	85.3076	5.5
nitazoxanide	FDA756827	84.8238	5.77933
chloroxine	FDA131281	84.4539	0.8027
avermectin b1, ABAMECTIN (avermectin B1a shown)	FDA130115	83.2673
cetrimonium bromide	FDA131280	83.0605	6.163
ethacrynic acid	FDA130672	82.9318	2.6
phenothiazine	FDA286007	82.0797
bithionol, BITHIONATE SODIUM	FDA130002	81.3243	6.1
Itraconazole	FDA915021	79.7428
clioquinol	FDA285750	78.935	2.613
broxaldine	FDA756965	78.6714
clemizole hydrochloride	FDA149934	78.2875	6.51
Thioridazine hydrochloride	FDA130958	75.7364	8.084
chlorhexidine, CHLORHEXIDINE HYDROCHLORIDE	FDA130211	75.1394	9.133
nitroxoline	FDA756968	75.0937	6.699
nisoldipine	FDA285632	74.9395	9.814
piroctone olamine	FDA756713	72.6242	0.88305
beta-naphthol	FDA756989	69.2035	8.313
isosorbide dinitrate	FDA130039	69.0462
not available	FDA285788	68.1883
disulfiram	FDA130798	67.0168
nitrofurantoin	FDA130717	66.8881	11.64
chlormidazole	FDA756979	66.5615
butamben	FDA129893	66.2482
pregnenolone	FDA130372	66.2
merbromin	FDA756958	66.0813
levamisole hydrochloride	FDA131328	65.8453
Proroxan	Proroxan	65.1518	8.53333
lincomycin hydrochloride	FDA130687	64.7829
not available	FDA285770	63.4777
neomycin sulfate	FDA131713	63.2736
Tafenoquine Succinate	Tafenoquine Succinate	63.0867	14.1
not available	FDA285837	62.9313
hydroflumethiazide	FDA130846	62.4912
methylthiouracil	FDA130878	61.6444
nifuroxazide	FDA255816	61.5544
not available	FDA955201	60.9487
oxidopamine hydrochloride	FDA130226	59.2292
tuaminoheptane sulfate	FDA130600	59.0911
thiram	FDA131347	58.8997
tenylidone	FDA757039	58.52
moxidectin	FDA756757	58.3139
Niclosamide Analog #2 3,5-dichloro-N-(2-chloro-4-nitrophenyl)-2-hydroxybenzamide	ChemBridge7660547	57.7503	0.8
phensuccimide	FDA756748	57.7451
saccharin	FDA130053	57.1348
dichlorvos	FDA131606	56.8452
benzoxiquine	FDA735781	56.6132
Bepridil hydrochloride	FDA131511	56.554
deferoxamine mesylate	FDA130771	56.4339
eprinomectin	FDA756836	56.3632	3.7
not available	FDA955232	56.1699
nimesulide	FDA131322	56.0218
lufenuron	FDA735770	55.9758
chlorambucil	FDA130016	55.5824
ascorbyl palmitate	FDA756762	54.6272
eucatropine hydrochloride	FDA130674	54.425
levonordefrin	FDA131411	53.5591
not available	FDA957535	53.491
norethindrone acetate	FDA130262	53.3297
hydrocortisone valerate	FDA735786	53.3293
apomorphine hydrochloride	FDA129989	53.2513
olsalazine sodium	FDA756788	53.187
dequalinium chloride	FDA129955	52.3016
ritonavir	FDA285663	51.9074
clofazimine	FDA255714	51.0258	35.81
not available	FDA285733	51.0228
primaquine diphosphate, PRIMAQUINE PHOSPHATE	FDA130903	50.6902	5.059
Pentamidine isethionate	FDA130651	49.6275
nifenazone	FDA131321	49.6025
ioversol	FDA756926	49.5938
not available	FDA285765	48.9199
lactulose	FDA130684	48.8918
Bosentan	FDA915020	48.812
Carisoprodol	FDA130009	48.1978
ketotifen fumarate	FDA130332	47.7402
tenofovir	FDA756928	47.4144
vinblastine sulfate	FDA131837	47.4096
Nimodipine	FDA131718	47.3439
not available	FDA957621	47.1663
(-)-Physostigmine, PHYSOSTIGMINE SALICYLATE	FDA130205	47.1167	13.58
not available	FDA285704	47.045
metaproterenol	FDA130698	46.9666
fenaclon	FDA757063	46.7829
melengestrol acetate	FDA756795	46.7469
isoniazid	FDA130682	46.5328
bromocriptine mesylate	FDA130003	45.8058
Suramin hexasodium	FDA131836	45.7943
methimazole	FDA130871	45.7087
ethanolamine oleate	FDA756963	45.1634
doramectin	FDA756899	44.9331
not available	FDA955199	44.6816
beta-propiolactone, PROPIOLACTONE	FDA130134	44.3536
not available	FDA957602	44.3431
not available	FDA957596	43.7836
roxithromycin	FDA131340	43.6855
homatropine bromide, HOMATROPINE HYDROBROMIDE	FDA130839	43.6203
benzyl isothiocyanate	FDA131769	43.2574
raloxifene hydrochloride	FDA255971	43.1651
estramustine	FDA756931	43.1323
nitromide	FDA130882	43.1009
methicillin sodium	FDA130870	42.9404
succinylsulfathiazole	FDA93719	42.9132
Phentolamine mesylate, PHENTOLAMINE HYDROCHLORIDE	FDA129919	42.9034
estriol	FDA130810	42.843
hydroxyzine pamoate	FDA130849	42.803
not available	FDA255751	42.5905
coumarin	FDA131107	42.5885
eugenol	FDA131694	42.3846
nikethamide	FDA756770	42.3445
lacitol	FDA757048	42.2701
not available	FDA957532	41.9846
norgestrel, LEVONORGESTREL	FDA130725	41.9713
tyrothricin	FDA130072	41.859
Azathioprine	FDA38244	41.8272
not available	FDA955234	41.3715
nitrofurazone	FDA130718	40.6104
rifaximin	FDA735740	40.5348
oxiconazole nitrate	FDA285932	40.5194
not available	FDA957585	40.4272
iproheptine	FDA757052	40.4231
aztreonam	FDA735605	40.3162
not available	FDA957616	40.2875
amlexanox	FDA757065	40.2093
terpene hydrate	FDA756763	40.1843
pyrantel pamoate, OXANTEL PAMOATE	FDA732314	39.8871
sennoside a	FDA131458	39.8772
not available	FDA285694	39.8044
betamethasone	FDA129998	39.7915
fluorouracil	FDA130676	39.3015
Tripelennamine hydrochloride, TRIPELENNAMINE CITRATE	FDA129950	39.2801
oxyphenbutazone	FDA130886	39.0214
Metharbital	FDA957946	38.8963
Nitrendipine	FDA131714	38.8934
fenbendazole	FDA131087	38.8568
not available	FDA285923	38.7227
modafinil	FDA285996	38.6941
Remifentanil hydrochloride	FDA967094	38.6618
carzenide	FDA80003	38.4033
(Â±)-Propranolol hydrochloride, PROPRANOLOL HYDROCHLORIDE (+/-)	FDA131724	38.3874
methysergide maleate	FDA756841	38.2808
nicopholine	FDA757064	38.2758
dantron, DANTHRON	FDA131591	38.2581	18.26
selenomethionine	FDA757040	38.2018
hydrocortisone sodium phosphate, HYDROCORTISONE PHOSPHATE TRIETHYLAMINE	FDA130845	38.0092
Amitriptyline hydrochloride	FDA129981	37.8218
phytonadione	FDA735896	37.6756
azelaic acid	FDA129909	37.5621
chlorazanil hydrochloride	FDA756974	37.3878
metaxalone	FDA131509	37.3305
sevoflurane	FDA285893	37.2461
furosemide	FDA130823	37.2072
cintriamide	FDA756890	37.1496
promazine hydrochloride	FDA130911	37.1487
Indomethacin	FDA130853	36.6167
flutamide	FDA131076	36.5735
not available	FDA285693	36.5107
bromopride	FDA131271	36.3799
riboflavin	FDA735546	36.2295	16.03
(Â±)-Ibuprofen, IBUPROFEN	FDA130680	36.0758
allylthiourea	FDA757057	35.983
diltiazem hydrochloride	FDA130138	35.9497
spiramycin	FDA130234	35.8883
Fulvestrant	FDA915010	35.8538
gramicidin (gramicidin a shown)	FDA285699	35.8372
S-(-)-Carbidopa, CARBIDOPA	FDA254935	35.801
exalamide	FDA131357	35.7286
triclosan	FDA735508	35.7096
liothyronine	FDA756773	35.6543
halazone	FDA130833	35.6191
pidolic acid	FDA732980	35.5797
not available	FDA285706	35.5381
lansoprazole	FDA131400	35.5139
piperacetazine	FDA756749	35.4374
tazobactam	FDA756718	35.433
mefenamic acid	FDA130123	35.277
inositol	FDA131476	35.2766
hydroxyurea	FDA130848	35.1241
altrenogest	FDA735833	34.9041
urethane	FDA131346	34.7092
betaine hydrochloride	FDA131238	34.6175
methacholine chloride	FDA255933	34.5695
amphotericin b	FDA735584	34.5091
not available	FDA285695	34.4181
Scopolamine Methyl Bromide	FDA959914	34.3671
not available	FDA285696	34.0559
anethole	FDA131483	33.9713
bezafibrate	FDA131286	33.7854
Arecoline hydrobromide	FDA129908	33.7795
resorcinol monoacetate	FDA131361	33.6794
amikacin sulfate	FDA129975	33.6486
Varenicline Tartrate	FDA957985	33.5769
levalbuterol hydrochloride	FDA735822	33.5412
ketoprofen	FDA131174	33.4209
carbenicillin disodium	FDA130007	33.3893
carboplatin	FDA757076	33.3616
oseltamivir phosphate	FDA756917	33.2753
Methoxamine hydrochloride	FDA130874	33.1568
Acyclovir	FDA131362	33.1334
meglutol	FDA756751	33.0106
rosiglitazone, ROSIGLITAZONE MALEATE	FDA131500	32.9565
amylene hydrate	FDA757049	32.9441
Pyridostigmine bromide	FDA131325	32.8929
norgestrel	FDA756793	32.8919
hydroxyamphetamine hydrobromide	FDA131005	32.8896
doxazosin mesylate	FDA158932	32.8648
Treprostinil	FDA957971	32.8269
chloramphenicol palmitate	FDA735509	32.6435
not available	FDA957554	32.5285
Clobazam	FDA967082	32.4366
dextromethorphan hydrobromide	FDA255707	32.1616
phenethicillin potassium	FDA130496	32.0183
imiquimod	FDA756779	31.9466
hydrocortisone hemisuccinate	FDA130743	31.8524
quinethazone	FDA756814	31.8281
(Â±)-p-Chlorophenylalanine, FENCLONINE	FDA131220	31.6157
lactose monohydrate	FDA757036	31.5456
mitoxanthrone hydrochloride, MITOXANTRONE HYDROCHLORIDE	FDA131341	31.492
not available	FDA957547	31.2427
Quinacrine dihydrochloride, QUINACRINE HYDROCHLORIDE	FDA130700	31.2404
indapamide	FDA130852	31.1943
fluroxene	FDA756796	31.081
dexamethasone sodium phosphate	FDA130776	31.0773
not available	FDA957617	31.0734
olmesartan	FDA756724	31.0661
kanamycin sulfate, KANAMYCIN A SULFATE	FDA130861	31.045
metronidazole	FDA99068	30.8502
heptaminol hydrochloride	FDA129881	30.846
Gallamine triethiodide	FDA130825	30.83
methylergonovine maleate	FDA130214	30.8149
tyrosine	FDA756852	30.7773
benzoyl peroxide	FDA735776	30.7643
Sodium (2,6-diisopropylphenoxy)methyl Phosphate	FDA967090	30.7542
amodiaquine dihydrochloride	FDA129982	30.6811
sodium gluconate	FDA757071	30.5139
iodipamide	FDA130962	30.5108
mepenzolate bromide	FDA130866	30.4073
not available	FDA285903	30.365
FLUTICASONE PROPIONATE	FDA807172	30.3535
lomustine	FDA285631	30.3329
prilocaine hydrochloride	FDA131338	30.3209
ethopropazine hydrochloride	FDA130673	30.1918
Pirenperone	FDA131548	30.1164
homoharringtonie	FDA914980	30.0068
d-limonene	FDA757051	29.9871
quinine ethyl carbonate	FDA131154	29.7995
Zaprinast	FDA131162	29.7556
not available	FDA955195	29.7414
fusidic acid	FDA130824	29.6354
tannic acid	FDA131471	29.6352
hydrocortisone	FDA131015	29.5794
lindane	FDA131652	29.3509
LAAM hydrochloride	FDA967091	29.3474
duloxetine hydrochloride	FDA756831	29.2362
not available	FDA285759	29.2046
nitarsone	FDA756938	29.116
dasatinib	FDA756746	29.058
chlorguanide hydrochloride, CHLOROGUANIDE HYDROCHLORIDE	FDA131550	28.9606
denatonium benzoate	FDA756816	28.8902
Lidocaine hydrochloride	FDA130973	28.876
vatalanib dihydrochloride	FDA914979	28.83
not available	FDA957599	28.8109
Cefepime	FDA915017	28.7796
Bromazine Hydrochloride	FDA967100	28.7673
mitotane	FDA131662	28.6775
fluorometholone	FDA131736	28.6392
beta-escin	FDA129889	28.5431
Pindolol	FDA130893	28.5417
hydrocortisone acetate	FDA130843	28.4646
estradiol benzoate	FDA756800	28.445
Diltiazem hydrochloride	FDA254926	28.442
Nomifensine maleate	FDA130695	28.3835
(Â±)-Baclofen, BACLOFEN	FDA129991	28.3474
isoxsuprine hydrochloride	FDA130860	28.2977
not available	FDA255704	28.2493
selamectin	FDA735745	28.2347
methotrexate(+/-)	FDA255662	28.2168
lobendazole	FDA735785	28.1578
thyroxine, LEVOTHYROXINE	FDA130963	28.0767
prednicarbate	FDA756825	28.0743
not available	FDA957561	28.069
piconol	FDA303566	28.0582
9-Amino-1,2,3,4-tetrahydroacridine hydrochloride, TACRINE HYDROCHLORIDE	FDA88522	28.0426
undecylenic acid, ZINC UNDECYLENATE	FDA735790	28.0056
benzoylpas	FDA735783	27.9975
nefazodone hydrochloride	FDA285948	27.9686
cefdinir	FDA131682	27.7539
sulfadimethoxine	FDA131123	27.7444
not available	FDA957581	27.7037
furazolidone	FDA130822	27.5732
Caspofungin diacetate	FDA959910	27.4443
Zuclopenthixol Succinate Salt	FDA957986	27.4325
not available	FDA957568	27.2716
ammonium lactate	FDA757070	27.2579
not available	FDA955218	27.2068
Pyrilamine maleate	FDA130919	27.1507
hydrastine (1r, 9s)	FDA255834	27.0685
erythrosine sodium	FDA756808	27.0389
tinidazole	FDA131239	27.0357
imatinib	FDA285831	27.0028
not available	FDA957622	26.9619
zaleplon	FDA285990	26.9524
cefmenoxime hydrochloride	FDA756725	26.9456
(Â±)-gamma-Vinyl GABA, VIGABATRIN	FDA130169	26.7502
not available	FDA285764	26.6298
vancomycin hydrochloride	FDA130081	26.5871
Theobromine	FDA129907	26.5452
Loperamide hydrochloride	FDA130172	26.5187
methoxsalen	FDA130875	26.4882
tramadol hydrochloride	FDA735779	26.4871
pramoxine hydrochloride	FDA131119	26.2364
not available	FDA285833	26.0201
Mitiglinide calcium	FDA957987	25.9451
not available	FDA285758	25.9018
astemizole	FDA130188	25.8991
Dinoprostone	FDA255803	25.7267
dabigatran etexilate mesylate	FDA756753	25.661
phenacemide	FDA130697	25.6575
anagrelide hydrochloride	FDA735868	25.6557
ethynodiol diacetate	FDA756821	25.4507
not available	FDA955203	25.351
fluocinolone acetonide	FDA130675	25.2676
aloin	FDA129884	25.2073
isoflupredone acetate	FDA756855	25.1846
sibutramine hydrochloride	FDA131795	25.1742
rasagiline	FDA756894	25.1608
nizatidine	FDA285839	25.1421
nystatin	FDA129910	25.0796
tepoxalin	FDA756754	25.052
not available	FDA955221	25.042
natamycin	FDA735875	25.0417
not available	FDA255709	25.0193
indoprofen	FDA130854	25.0124
not available	FDA957537	24.9773
maprotiline hydrochloride	FDA130689	24.9537
piperacillin sodium	FDA130894	24.9362
Clorgyline hydrochloride, CLORGILINE HYDROCHLORIDE	FDA255197	24.9098
Mianserin hydrochloride	FDA255131	24.9005
bergapten	FDA130662	24.89
phenylethyl alcohol	FDA735780	24.8826
leucovorin calcium	FDA130685	24.8555
not available	FDA285857	24.7757
carbimazole	FDA255752	24.7672
not available	FDA285763	24.71
selegiline hydrochloride	FDA756933	24.6827
alrestatin	FDA131289	24.6779
not available	FDA285771	24.676
flurandrenolide	FDA130098	24.6678
bicalutamide	FDA285819	24.6592
benzoic acid	FDA286022	24.5992
oxytetracycline	FDA130733	24.583
SKF-525A hydrochloride, PROADIFEN HYDROCHLORIDE	FDA131298	24.5797
doxorubicin	FDA735562	24.5772
sulfanilate zinc	FDA757077	24.5262
liothyronine sodium, LIOTHYRONINE (L- isomer) SODIUM	FDA131287	24.4274
tadalafil	FDA756932	24.3972
butyl paraben	FDA285820	24.3854
trichlormethiazide	FDA130596	24.2886
salicyl alcohol	FDA130928	24.2545
mycophenolic acid	FDA131710	24.2493
Caffeine	FDA131170	24.2409
estrone	FDA130811	24.2331
not available	FDA255931	24.164
not available	FDA955212	24.1537
not available	FDA957624	24.146
Proglumide	FDA131105	24.0748
isopropamide iodide	FDA130048	24.0134
moxisylyte hydrochoride	FDA255617	23.9905
bifonazole	FDA285641	23.96
ARGATROBAN	FDA807153	23.9478
flumequine	FDA130090	23.8653
cinoctramide	FDA757053	23.7209
chloropyramine hydrochloride	FDA255946	23.7002
cinchonine	FDA129911	23.695
busulfan	FDA130004	23.6892
epirubicin hydrochloride	FDA285612	23.6748
Bethanechol chloride	FDA130000	23.671
Cilastatin	FDA915022	23.6594
mestranol	FDA735763	23.6469
dexpropranolol hydrochloride	FDA735850	23.6272
cyclizine	FDA130762	23.5451
Ximelagatran	FDA957930	23.5102
Pirenzepine dihydrochloride, PIRENZEPINE HYDROCHLORIDE	FDA131118	23.4861
cyproterone acetate	FDA130766	23.482
ipriflavone	FDA129965	23.4684
tapentadol hydrochloride	FDA756934	23.4587
not available	FDA957552	23.4215
N-Vanillylnonanamide, NONIVAMIDE	FDA130227	23.4207
lisinopril	FDA130358	23.41
Zanamivir	FDA957924	23.4057
tiratricol	FDA255664	23.3934
aceclofenac	FDA255660	23.3499
not available	FDA957600	23.3473
guaifenesin	FDA130831	23.3133
pyrethrins	FDA756891	23.2924
adapalene	FDA285958	23.1964
tigecycline	FDA756929	23.0145
Methiothepin mesylate, METITEPINE MALEATE	FDA131716	23.0016
not available	FDA255681	22.9898
canrenoic acid, potassium salt	FDA130981	22.8534
Ceftriaxone Disodium Salt Hemiheptahydrate	FDA957973	22.8524
not available	FDA957571	22.8148
metyrapone	FDA285615	22.711
benzoclidine	FDA757055	22.6421
not available	FDA255961	22.6386
(+)-Methamphetamine hydrochloride	FDA967092	22.6361
oxolinic acid	FDA131196	22.6348
vilazodone hydrochloride	FDA756760	22.6127
sulbentine	FDA757025	22.5954
d-(+)-maltose	FDA757043	22.5836
salicylamide	FDA130929	22.5744
flumethazone pivalate	FDA130404	22.5222
quinine sulfate	FDA130923	22.4972
efaroxan, EFAROXAN HYDROCHLORIDE	FDA131813	22.3665
solifenacin succinate	FDA756739	22.2661
not available	FDA255689	22.2643
not available	FDA957533	22.2002
timolol maleate	FDA130277	22.1566
5-fluoro-5'-deoxyuridine, DOXIFLURIDINE	FDA131711	22.1495
afalanine	FDA757058	22.0741
sulfamethizole	FDA130942	22.0391
lumiracoxib	FDA756789	21.9777
Alprenolol hydrochloride, ALPRENOLOL	FDA130120	21.9382
terbinafine hydrochloride	FDA285824	21.937
fenspiride hydrochloride	FDA131090	21.9169
pizotyline malate	FDA735607	21.751
guanabenz acetate	FDA130677	21.691
not available	FDA285957	21.6456
dibekacin	FDA131273	21.529
Cefonicid sodium	FDA957969	21.524
roxarsone	FDA130927	21.4879
meclizine hydrochloride	FDA130691	21.383
ticlopidine hydrochloride	FDA255618	21.3071
felbamate	FDA914981	21.2538
not available	FDA285712	21.2435
not available	FDA285708	21.2188
thiamylal sodium	FDA131784	21.2086
Guanabenz acetate	FDA254863	21.1984
sulfanilamide	FDA130354	21.085
quinidine gluconate	FDA130922	21.0219
ampicillin sodium	FDA129984	20.8955
lapatinib di-p toluenesulfonate	FDA914975	20.8289
acrisorcin	FDA138099	20.8085
alfuzosin hydrochloride	FDA735518	20.7725
not available	FDA285738	20.7157
not available	FDA957591	20.6808
Protriptyline hydrochloride, PROTRYPTYLINE HYDROCHLORIDE	FDA254858	20.6337
pazufloxacin mesylate	FDA756995	20.6283
difloxacin hydrochloride	FDA756772	20.5963
Triprolidine hydrochloride	FDA48651	20.5545
Iloprost	FDA914995	20.5381
Arformoterol Tartrate	FDA959915	20.4766
not available	FDA285910	20.4382
phenelzine sulfate	FDA130681	20.4236
not available	FDA255960	20.3421
dicyclomine hydrochloride	FDA130782	20.1912
not available	FDA285739	20.1334
buflomedil hydrochloride	FDA255741	20.0546
cefamandole nafate	FDA131206	19.9486
mexiletine hydrochloride	FDA131401	19.9482
pempidine tartrate	FDA131354	19.8428
Lorglumide sodium	FDA131560	19.8087
ergotamine tartrate	FDA756936	19.794
acetarsol	FDA130610	19.7149
mupirocin	FDA735858	19.5132
not available	FDA285630	19.4764
medroxyprogesterone acetate	FDA130693	19.4168
bendrofumethiazide, BENDROFLUMETHIAZIDE	FDA131267	19.4148
pipemidic acid	FDA131192	19.3864
oxfendazole	FDA285825	19.3431
Cefoperazone sodium salt	FDA255696	19.3192
daunorubicin	FDA285683	19.3189
carglumic acid	FDA757056	19.3146
Phenylbutazone	FDA130888	19.2878
levcycloserine	FDA756922	19.2682
Prazepam	FDA967093	19.2622
OLOPATADINE HCl	FDA811671	19.212
phenothrin	FDA131668	19.2081
artemether	FDA756714	19.2026
(Â±)-Isoproterenol hydrochloride, ISOPROTERENOL HYDROCHLORIDE	FDA130858	19.1333
sulfamerazine	FDA129882	19.1305
not available	FDA957542	19.0894
not available	FDA957553	19.0604
sisomicin sulfate	FDA130263	19.0274
trimipramine maleate	FDA131275	19.0009
sulfamethoxazole	FDA130943	18.978
rimantadine hydrochloride	FDA757035	18.9701
estradiol dipropionate	FDA756790	18.9144
pitavastatin calcium, PITAVASTATIN CALCIUM	FDA756719	18.9128
racecadotril	FDA255859	18.8688
tolfenamic acid	FDA131161	18.7607
not available	FDA957543	18.7452
not available	FDA285928	18.7331
Oxymetazoline hydrochloride	FDA130731	18.6738
candesartan	FDA285748	18.6228
nateglinide	FDA735765	18.5824
not available	FDA955200	18.5551
not available	FDA957631	18.5356
Fluoxetine hydrochloride, FLUOXETINE	FDA131498	18.5349
valacyclovir hydrochloride	FDA285636	18.5075
fosfosal	FDA131182	18.501
hexylene glycol	FDA756935	18.499
ethinyl estradiol	FDA130813	18.4829
tacrolimus	FDA756817	18.4766
fenoprofen	FDA131086	18.4515
isoleucine (l)	FDA756845	18.4492
cinnarazine	FDA131283	18.4225
hetacillin potassium	FDA130836	18.4221
Etoricoxib	FDA914999	18.4189
not available	FDA955236	18.3892
fludrocortisone acetate	FDA130817	18.3752
halothane	FDA735836	18.3573
Carbetapentane citrate	FDA131112	18.3413
not available	FDA285827	18.3264
iothalamic acid	FDA756818	18.2619
chenodiol	FDA130171	18.224
Cysteamine hydrochloride	FDA131516	18.1892
hyoscyamine	FDA130850	18.1787
betamethasone sodium phosphate	FDA756783	18.1685
ftaxilide	FDA117230	18.1665
testosterone	FDA131029	18.1504
pyrithyldione	FDA131260	18.0725
not available	FDA285983	18.0571
trientine hydrochloride	FDA735803	17.9679
L-Glutamine, GLUTAMINE (L)	FDA129945	17.965
saxagliptin	FDA756948	17.9533
not available	FDA285623	17.9422
roxatidine acetate hydrochloride	FDA756901	17.916
clopidol	FDA735650	17.9125
carnitine hydrochloride, CARNITINE (dl) HYDROCHLORIDE	FDA129914	17.8584
metaraminol bitartrate	FDA131330	17.8266
Tranylcypromine HCl (Sigma)	Tranylcypromine HCl (Sigma)	17.8175
bisoctrizole	FDA756892	17.759
Rifampicin	Rifampicin	17.7347
nevirapine	FDA756811	17.7148
not available	FDA285917	17.7078
Levetiracetam	FDA915027	17.6859
not available	FDA286024	17.6402
isotretinon	FDA131748	17.6369
not available	FDA285644	17.6364
ursodiol	FDA130624	17.623
not available	FDA957615	17.5202
terazosin hydrochloride	FDA255964	17.5201
deflazacort	FDA756787	17.4744
not available	FDA955222	17.4367
Aniracetam	FDA131255	17.4163
guanethidine sulfate, GUANETHIDINE MONOSULFATE	FDA130832	17.4038
moroxydine hydrochloride	FDA255627	17.3803
gentamicin sulfate	FDA130827	17.3755
butacaine	FDA131391	17.3541
fludarabine phosphate	FDA735852	17.3472
L-alpha-Methyl DOPA, METHYLDOPA	FDA130704	17.3435
(Â±)-p-Aminoglutethimide, AMINOGLUTETHIMIDE	FDA129979	17.3304
clorsulon	FDA735495	17.3113
noscapine hydrochloride	FDA130884	17.2926
inosine	FDA130317	17.284
dobutamine hydrochloride	FDA131730	17.2786
not available	FDA285937	17.2552
Quipazine dimaleate, QUIPAZINE MALEATE	FDA131359	17.2526
not available	FDA285985	17.1911
bumetanide	FDA131177	17.1843
balsalazide disodium	FDA285799	17.1506
eucalyptol	FDA735717	17.1321
not available	FDA957539	17.1311
Debrisoquin sulfate	FDA254793	17.1105
Triamterene	FDA130590	17.1048
diflorasone diacetate	FDA756766	17.0436
not available	FDA41379	16.9893
semustine	FDA131030	16.9554
penfluridol	FDA735635	16.9234
cyclophosphamide hydrate, CYCLOPHOSPHAMIDE	FDA130764	16.9034
aminopyrine	FDA255628	16.8504
Risperidone	FDA254942	16.8168
Clofibrate	FDA131360	16.7952
puromycin hydrochloride, PUROMYCIN DIHYDROCHLORIDE	FDA131712	16.7393
cefadroxil	FDA735510	16.7393
folic acid	FDA131189	16.6937
azaserine	FDA735492	16.6818
Flunitrazepam	FDA967087	16.627
dacarbazine	FDA130767	16.6001
coumophos	FDA131600	16.5968
not available	FDA286016	16.5687
Pipecuronium Bromide	FDA967103	16.523
dexlansoprazole	FDA756735	16.5088
thiamine	FDA735788	16.4852
ropinirole hydrochloride	FDA735768	16.4615
berberine chloride	FDA130969	16.4568
piperonyl butoxide	FDA757044	16.3784
danazol	FDA130768	16.3276
amisulpride	FDA756993	16.3058
amlodipine besylate	FDA756824	16.2968
aminolevulinic acid hydrochloride	FDA131547	16.2736
glucosamine hydrochloride	FDA130829	16.2712
Pivmecillinam	FDA967101	16.2701
Chlorothiazide	FDA130024	16.2569
cisplatin	FDA131309	16.2463
DACTINOMYCIN	FDA285657	16.2256
not available	FDA957592	16.2185
brompheniramine maleate	FDA131421	16.2006
not available	FDA957595	16.1991
spaglumic acid	FDA130251	16.1989
not available	FDA957637	16.1893
homatropine methylbromide	FDA130840	16.1722
thioxolone, TIOXOLONE	FDA131263	16.0798
Acetohexamide	FDA255155	16.0624
artemisinin	FDA131184	16.0573
nicotinyl alcohol tartrate	FDA731076	15.9795
aklomide	FDA131690	15.9763
Captopril	FDA130482	15.95
tolmetin sodium	FDA130703	15.9224
procarbazine hydrochloride	FDA285633	15.9126
oxolamine citrate	FDA255952	15.9098
ecamsule triethanolamine	FDA756897	15.8534
4-Aminopyridine, FAMPRIDINE	FDA129957	15.8351
ticarcillin disodium	FDA756847	15.8306
pronetalol hydrochloride	FDA131367	15.809
cresol	FDA130760	15.7797
dimethyl fumarate	FDA756774	15.7631
sorbitol	FDA757061	15.7624
Chlorpromazine hydrochloride, CHLORPROMAZINE	FDA130028	15.7168
olmesartan medoxomil	FDA131685	15.6889
Doxepin hydrochloride	FDA255171	15.6765
bronopol	FDA757019	15.6331
not available	FDA955213	15.632
not available	FDA957555	15.6023
aspartame	FDA735497	15.5729
erythritol	FDA757047	15.566
Temsirolimus	FDA957947	15.5485
Eprosartan mesylate	FDA915032	15.5286
rosuvastatin, ROSUVASTATIN CALCIUM	FDA131735	15.5266
Domperidone	FDA130247	15.5265
norethindrone	FDA130721	15.5249
chlorprothixene hydrochloride	FDA131282	15.5041
sodium salicylate	FDA130930	15.4474
Fenretinide	FDA754237	15.4451
Pramoxine	Pramoxine	15.4411
thiopental sodium	FDA131756	15.3927
travoprost	FDA756867	15.3854
colesevalam hydrochloride (high mol wt copolymer @10mg/ml)	FDA757069	15.3686
mafenide hydrochloride	FDA130688	15.3677
floxuridine	FDA131248	15.3426
tegaserod maleate	FDA131741	15.3418
ceftazidime	FDA756863	15.3067
betahistine hydrochloride	FDA130297	15.2911
ergocalciferol	FDA130671	15.2899
demeclocycline hydrochloride	FDA130773	15.2784
retinol	FDA131166	15.2579
not available	FDA285714	15.2112
brinzolamide	FDA756881	15.0019
Xylazine hydrochloride, XYLAZINE	FDA131163	14.9671
nifursol	FDA756961	14.9586
not available	FDA957625	14.9343
ethacridine lactate	FDA34751	14.9237
carteolol hydrochloride	FDA756720	14.8514
methylprednisolone	FDA131740	14.7938
artenimol	FDA735870	14.7911
etomidate	FDA756844	14.7749
probenecid	FDA130905	14.7687
not available	FDA285835	14.7685
aliskiren hemifumarate	FDA735819	14.7498
niacin	FDA130881	14.7429
carbadox	FDA735519	14.7404
manidipine hydrochloride	FDA756872	14.7301
pyritinol	FDA757014	14.7134
norepinephrine	FDA735731	14.685
minocycline hydrochloride	FDA130709	14.6246
scopolamine hydrobromide	FDA130931	14.6164
Fluphenazine dihydrochloride, FLUPHENAZINE HYDROCHLORIDE	FDA130071	14.5972
Everolimus	FDA967129	14.594
not available	FDA957579	14.5911
bismuth subsalicylate	FDA735507	14.5871
galanthamine hydrobromide, GALANTAMINE	FDA131165	14.5717
cetirizine hydrochloride	FDA255791	14.5696
kainic acid	FDA130180	14.5634
pentagastrin	FDA756815	14.563
Troglitazone	FDA915018	14.5127
paroxetine hydrochloride	FDA131592	14.4693
Levocabastine??HCl	FDA915030	14.4449
not available	FDA955224	14.4274
not available	FDA255661	14.3562
norethynodrel	FDA130723	14.3547
ritodrine hydrochloride	FDA131128	14.334
cytisine	FDA131442	14.3279
Glibenclamide, GLYBURIDE	FDA130141	14.2202
chloralose	FDA756983	14.1987
dexpanthenol	FDA255610	14.1952
not available	FDA957574	14.1457
betamethasone valerate	FDA131167	14.1339
gefitinib	FDA756745	14.0943
ROPIVACAINE HCl	FDA285950	14.0787
naphazoline hydrochloride	FDA130713	14.075
sulfamethoxypyridazine	FDA131135	14.0696
cephalosporin c sodium	FDA130985	14.0601
Atazanavir	FDA915028	13.9988
troclosene potassium	FDA756765	13.988
sodium monofluorophosphate	FDA756767	13.9684
azlocillin sodium	FDA131265	13.9355
prazosin hydrochloride	FDA130899	13.9068
rolitetracycline	FDA735837	13.8977
trisodium ethylenediamine tetracetate	FDA130802	13.891
prulifloxacin	FDA756998	13.8879
not available	FDA285662	13.8631
Gabapentin	FDA255970	13.8389
digoxin	FDA130788	13.8384
not available	FDA285852	13.8375
sirolimus	FDA735755	13.8344
betamethasone 17,21-dipropionate	FDA131800	13.8098
urea	FDA130632	13.7963
ethisterone	FDA131316	13.7662
oxybenzone	FDA130730	13.742
pravastatin sodium	FDA756781	13.7085
atorvastatin calcium	FDA131706	13.6395
guanfacine hydrochloride	FDA255700	13.634
idebenone	FDA285747	13.6116
cresopyrine, CRESOPIRINE	FDA131116	13.6079
nithiamide	FDA756837	13.5867
clofarabine	FDA756738	13.5505
dactinomycin	FDA735526	13.5477
iodixanol	FDA756791	13.5342
not available	FDA955196	13.5201
albendazole	FDA131386	13.5076
not available	FDA957623	13.4955
timonacic	FDA756975	13.465
ascorbic acid	FDA130121	13.4259
acedapsone	FDA735498	13.4051
Trimethoprim	FDA130041	13.396
fenofibrate	FDA131085	13.383
cyclobenzaprine hydrochloride	FDA131311	13.3711
pasiniazid	FDA138101	13.2971
biperiden	FDA255790	13.2888
rufloxacin hydrochloride	FDA757001	13.2413
not available	FDA957619	13.1723
not available	FDA255864	13.1705
Valproic acid sodium, VALPROATE SODIUM	FDA130360	13.1593
beclamide	FDA756976	13.1406
carvedilol, CARVEDILOL PHOSPHATE	FDA131491	13.0644
cypermethrin	FDA285933	13.0498
althiazide	FDA130967	13.0088
not available	FDA285744	13.0055
diacerin	FDA131698	12.9998
Secobarbital	FDA967095	12.978
bromhexine hydrochloride	FDA131270	12.9743
sulfachlorpyridazine	FDA129943	12.9645
not available	FDA957604	12.9552
mequinol	FDA733178	12.8782
Memantine hydrochloride	FDA130383	12.8674
cefsulodin sodium	FDA756801	12.8636
Dorzolamide??HCl	FDA915034	12.8409
e-capsaicin, CAPSAICIN	FDA130223	12.8383
atropine oxide	FDA757031	12.822
Cabergoline	FDA914998	12.8101
candesartan cilextil	FDA131502	12.7763
ethaverine hydrochloride	FDA131079	12.774
dexchlorpheniramine maleate	FDA285611	12.7503
ganciclovir	FDA255956	12.7176
not available	FDA285914	12.7121
Delavirdine mesylate	FDA915035	12.7102
Tolbutamide	FDA130110	12.678
Temazepam	FDA967097	12.6778
cephalexin	FDA131194	12.6461
ofloxacin	FDA131219	12.6299
not available	FDA955204	12.6169
ifosfamide	FDA286002	12.6087
phenindione	FDA130699	12.5984
monobenzone	FDA285868	12.5804
Tropicamide	FDA130608	12.5691
progesterone	FDA130910	12.566
Triazolam	FDA967098	12.5585
not available	FDA957540	12.5556
oxyphencyclimine hydrochloride	FDA131403	12.4905
topotecan hydrochloride	FDA285842	12.4818
cianidanol	FDA130249	12.4803
Minoxidil	FDA130710	12.4559
not available	FDA955207	12.4475
not available	FDA255720	12.4475
alverine citrate	FDA129973	12.4443
mesoridazine besylate	FDA255807	12.4326
gadoteridol	FDA757074	12.4218
Dobutamine hydrochloride	FDA254886	12.4196
cyclandelate	FDA285875	12.3686
methscopolamine bromide	FDA130876	12.357
quinaprilat	FDA756911	12.3275
protirelin	FDA756777	12.3197
mesna	FDA129956	12.3085
ceftibuten	FDA131673	12.2843
diethylstilbestrol	FDA130785	12.2184
Telenzepine dihydrochloride, TELENZEPINE HYDROCHLORIDE	FDA254905	12.197
not available	FDA285767	12.1869
n-acetylneuramic acid, ACENEURAMIC ACID	FDA130189	12.1484
thiamphenicol	FDA131278	12.1182
not available	FDA285625	12.1093
ouabain	FDA131583	12.1069
cyromazine	FDA285791	12.0703
Etretinate	FDA915016	12.0685
LEVOSULPIRIDE	FDA285860	12.0138
venlafaxine hydrochloride	FDA131494	11.9938
diatrizoic acid	FDA756784	11.9571
chlorobutanol	FDA285906	11.9228
oxaliplatin	FDA285779	11.8947
dropropizine	FDA130080	11.8902
fipexide hydrochloride	FDA131317	11.803
Diazoxide	FDA254893	11.7671
cephradine	FDA131169	11.6114
Ergoloid Mesylates	FDA957966	11.5715
not available	FDA285944	11.5659
not available	FDA957569	11.563
sitagliptin monophosphate monohydrate	FDA735886	11.5516
zidovudine [azt]	FDA735592	11.5333
Flunarizine dihydrochloride, FLUNARIZINE HYDROCHLORIDE	FDA131075	11.5248
perindopril erbumine	FDA131743	11.5248
lovastatin	FDA255798	11.5177
acetylcysteine	FDA735516	11.5116
gemfibrozil	FDA130826	11.5071
Mithramycin A	FDA957932	11.4922
clemastine, CLEMASTINE FUMARATE	FDA131697	11.482
not available	FDA955202	11.41
L-Aspartic acid, ASPARTIC ACID (L)	FDA255002	11.3995
not available	FDA285655	11.3933
bacampicillin hydrochloride	FDA131266	11.3632
Ciclesonide	FDA957974	11.3426
triamcinolone diacetate	FDA130521	11.335
not available	FDA955219	11.3311
tranylcypromine sulfate	FDA130679	11.306
aminopentamide sulfate	FDA735794	11.305
not available	FDA255750	11.2869
naftifine hydrochloride	FDA756732	11.2698
adiphenine hydrochloride	FDA28813	11.2282
methapyrilene hydrochloride	FDA131320	11.2236
Thiethylperazine maleate	FDA957940	11.155
bephenium hydroxynapthoate	FDA756858	11.0661
not available	FDA957560	11.0429
Atropine sulfate	FDA131139	11.0408
vinpocetine	FDA131274	11.008
Dolasetron	FDA915019	11.0063
chloramphenicol hemisuccinate, CHLORAMPHENICOL SODIUM SUCCINATE	FDA130018	10.906
Papaverine hydrochloride	FDA129916	10.9034
Flurazepam dihydrochloride	FDA967085	10.8891
antazoline phosphate	FDA130582	10.847
dibenzothiophene	FDA130778	10.8177
not available	FDA286000	10.81
Decamethonium dibromide, DECAMETHONIUM BROMIDE	FDA254912	10.8087
mefexamide, MEFEXAMIDE HYDROCHLORIDE	FDA131097	10.8048
trimeprazine tartrate	FDA130623	10.7977
mercaptopurine	FDA130696	10.6932
Tizanidine hydrochloride	FDA811696	10.6772
Fosphenytoin disodium salt hydrate	FDA959911	10.6417
adenosine phosphate	FDA129918	10.6241
nicergoline	FDA131114	10.5592
clomiphene citrate	FDA129930	10.4982
bromindione	FDA756833	10.4508
deet, DIETHYLTOLUAMIDE	FDA131672	10.4439
fipronil	FDA735545	10.4296
glimepiride	FDA285802	10.4206
bacitracin	FDA131140	10.3923
Spiperone hydrochloride, SPIPERONE	FDA131131	10.349
RIFABUTIN	FDA285859	10.3479
Valrubicin	FDA957929	10.3332
telithromycin	FDA756826	10.2956
rofecoxib	FDA129939	10.2731
erythromycin	FDA129937	10.2623
linagliptin	FDA756723	10.2327
pridinol methanesulfonate	FDA131254	10.2229
omeprazole	FDA255785	10.2082
Inulin	FDA959907	10.1859
chiniofon	FDA756967	10.1773
fosphomycin, FOSFOMYCIN CALCIUM	FDA131204	10.1388
buramate	FDA756924	10.1101
Tamoxifen citrate	FDA130950	10.0982
desvenlafaxine succinate	FDA756715	10.0663
Albuterol hemisulfate, ALBUTEROL	FDA130281	10.053
mitomycin c, MITOMYCIN	FDA131788	10.0435
Clodronic acid	FDA915012	10.0416
Bethanidine	FDA957967	10.0219
Aminoguanidine hemisulfate, PIMAGEDINE HYDROCHLORIDE	FDA255093	10.0099
sulfameter	FDA131134	9.99637
sulfamonomethoxine	FDA131126	9.97612
Nifedipine	FDA130715	9.97423
clinafoxacin hydrochloride	FDA756885	9.9292
not available	FDA285945	9.88484
not available	FDA957614	9.8812
iopanic acid	FDA131398	9.8778
pyrazinamide	FDA130918	9.85416
Stanozolol	FDA915026	9.85057
ractopamine hydrochloride	FDA756893	9.80921
Ceftazidime	FDA915025	9.78628
meclofenoxate hydrochloride	FDA131318	9.78305
armodafinil	FDA756712	9.7782
butenafine hydrochloride	FDA131466	9.77063
becanamycin sulfate, BEKANAMYCIN SULFATE	FDA130970	9.74633
crotamiton	FDA285855	9.71113
darifenacin hydrobromide	FDA756945	9.69387
not available	FDA955235	9.67343
Carbamazepine	FDA130006	9.66923
famotidine	FDA131081	9.66086
eszopiclone	FDA735520	9.65518
methsuximide	FDA756727	9.63277
not available	FDA957636	9.63194
edrophonium chloride	FDA130185	9.60082
ethyl vanillin	FDA756726	9.55699
phthalylsulfathiazole	FDA255976	9.55379
acepromazine maleate	FDA255830	9.5508
trimethobenzamide hydrochloride	FDA129938	9.51421
bemotrizinol	FDA756874	9.50965
avobenzone	FDA131506	9.49067
repaglinide	FDA756925	9.47276
Emtricitabine	FDA915013	9.46438
dicumarol	FDA130040	9.46409
capobenic acid	FDA735784	9.454
terfenadine	FDA255645	9.45059
irbesartan	FDA131514	9.44241
rivastigmine tartrate	FDA756883	9.42001
not available	FDA957632	9.41451
tranilast	FDA285793	9.41326
not available	FDA957589	9.41273
Nafarelin	FDA957945	9.33562
cefmetazole sodium	FDA131205	9.32462
Procaterol HCl hemihydrate	FDA915029	9.29442
alendronate sodium	FDA735711	9.25131
piracetam	FDA131198	9.2378
not available	FDA955208	9.22283
enilconazole	FDA756782	9.22143
S(-)-Timolol maleate	FDA254859	9.15758
lomefloxacin hydrochloride	FDA131203	9.14715
citicoline	FDA735523	9.14055
niacinamide	FDA285720	9.13208
Urapidil hydrochloride	FDA131264	9.10861
modaline sulfate	FDA756776	9.09606
Nicardipine hydrochloride	FDA131115	9.08258
Phenylephrine hydrochloride	FDA130889	9.01351
orotic acid	FDA757027	9.0034
diazinon, DIMPYLATE	FDA131605	8.98788
montelukast sodium	FDA756832	8.96773
ondansetron	FDA756871	8.95994
seratrodast	FDA756902	8.95313
daptomycin (5 millimolar/dmso)	FDA756927	8.93951
pheniramine maleate	FDA130887	8.92646
allantoin	FDA130964	8.92475
valganciclovir hydrochloride	FDA756839	8.88962
not available	FDA957609	8.8434
fluocinonide	FDA130819	8.83114
anisindione	FDA131186	8.82032
diperodon hydrochloride	FDA255690	8.78932
not available	FDA255870	8.74643
adrenolone hydrochloride	FDA756778	8.73804
dienestrol	FDA130783	8.73631
novobiocin sodium	FDA130716	8.70817
isobutamben	FDA756729	8.6068
formestane	FDA131475	8.59542
Loxapine succinate	FDA130239	8.5845
cefonicid sodium	FDA756840	8.5602
lanatoside c	FDA130100	8.55146
Morphine sulfate salt pentahydrate	FDA967104	8.53896
not available	FDA957578	8.51333
permethrin	FDA756959	8.44738
chlorthalidone	FDA130030	8.43604
Histamine dihydrochloride	FDA130678	8.42235
mebeverine hydrochloride	FDA130259	8.40972
not available	FDA955231	8.40855
barbital	FDA757018	8.4085
cycloheximide	FDA131256	8.38833
Nylidrin hydrochloride	FDA130727	8.35572
mannitol	FDA756915	8.35423
diosmin	FDA131315	8.35392
tretinon, TRETINOIN	FDA131574	8.34468
sulbactam	FDA756870	8.34468
Chloroquine phosphate, CHLOROQUINE DIPHOSPHATE	FDA130023	8.33774
cefotaxime sodium	FDA130012	8.32647
clenbuterol hydrochloride	FDA131392	8.31837
gluconolactone	FDA131262	8.31561
norgestimate	FDA735877	8.30958
sodium nitroprusside	FDA756819	8.26389
biotin	FDA130206	8.21971
methocarbamol	FDA130872	8.18854
omega-3-acid esters (epa shown)	FDA756717	8.16787
candicidin	FDA756889	8.14576
naproxol	FDA131379	8.14522
artesunate	FDA756764	8.13228
Clonidine hydrochloride	FDA131179	8.12431
amsacrine	FDA735623	8.08589
phenacetin	FDA130656	8.06341
L-_-phosphatidylserine (Brain, Porcine) (sodium salt)	FDA957952	8.03841
Encainide hydrochloride	FDA957953	8.03089
altretamine	FDA131249	8.02015
not available	FDA957627	8.00624
morantel citrate	FDA131402	7.9964
tilorone	FDA130208	7.967
iohexol	FDA756805	7.93825
mefloquine	FDA131251	7.91017
suxibuzone	FDA130077	7.90774
sulfisoxazole acetyl	FDA735867	7.88771
meclocycline sulfosalicylate	FDA131104	7.86983
moexipril hydrochloride	FDA914984	7.8614
evans blue	FDA756913	7.85324
not available	FDA285942	7.83824
tolperisone hydrochloride	FDA131683	7.81653
Pamidronic acid	FDA915011	7.81221
penbutolol sulfate	FDA756876	7.80644
estradiol	FDA130807	7.80474
todralazine hydrochloride	FDA131143	7.80372
felodipine	FDA255774	7.7963
Fosinopril	FDA915015	7.77394
IDARUBICIN HCl	FDA285891	7.72647
isovaleramide	FDA756802	7.7162
sulfadoxine	FDA286003	7.70733
thonzylamine hydrochloride	FDA130102	7.69632
Ethinamate	FDA967083	7.67355
xylometazoline hydrochloride	FDA130321	7.66237
Trihexyphenidyl hydrochloride	FDA130622	7.6535
Phenoxybenzamine hydrochloride	FDA130174	7.62664
uracil	FDA733116	7.60585
clavulanate lithium	FDA735602	7.58603
amlodipine besylate	FDA130376	7.5772
Tetraethylenepentamine pentahydrochloride	FDA967079	7.57429
decoquinate	FDA756830	7.54247
olanzapine	FDA285679	7.54049
dyclonine hydrochloride	FDA130801	7.54012
Cyproheptadine hydrochloride	FDA255138	7.53745
Riluzole	FDA255008	7.53705
entacapone	FDA756943	7.50088
butylated hydroxyanisole	FDA84536	7.45313
fenofibric acid	FDA756946	7.42504
not available	FDA285671	7.42301
Carboplatin	FDA735591	7.41345
tiletamine hydrochloride	FDA756829	7.40129
metformin hydrochloride	FDA255607	7.373
not available	FDA285865	7.30998
carbarsone	FDA756947	7.305
zomepirac sodium	FDA130303	7.27309
not available	FDA255670	7.21451
naltrexone hydrochloride	FDA131336	7.21019
ethoxzolamide	FDA756834	7.2048
penicillin v potassium	FDA130719	7.17574
paramethadione	FDA756877	7.17459
benurestat	FDA735838	7.11649
acetylcholine, ACETYLCHOLINE CHLORIDE	FDA129970	7.09593
(±)-Fenfluramine hydrochloride	FDA967086	7.09317
not available	FDA955228	7.08931
dutasteride	FDA756910	7.08098
canrenone	FDA735489	7.06992
not available	FDA285808	7.06652
triflupromazine hydrochloride	FDA129927	7.044
not available	FDA955226	7.02459
tibolone	FDA756734	7.01458
oxyphenonium bromide	FDA756978	7.00098
Bupropion hydrochloride, BUPROPION	FDA131490	6.98938
not available	FDA955230	6.98442
carsalam	FDA80295	6.98143
methazolamide	FDA131331	6.94296
ethyl paraben	FDA285935	6.94057
not available	FDA285926	6.90574
not available	FDA957556	6.8962
Aminophylline, THEOPHYLLINE	FDA88704	6.88867
enalapril maleate	FDA131173	6.87036
nilotinib	FDA914976	6.8602
flumazenil	FDA285801	6.85852
flurbiprofen	FDA130821	6.81242
desonide	FDA735847	6.80696
dirithromycin	FDA131526	6.80696
metolazone	FDA130192	6.80462
sulfacarbamide	FDA757046	6.79343
imexon	FDA756813	6.76048
sunitinib malate	FDA914978	6.75924
sparfloxacin	FDA756903	6.75335
methyclothiazide	FDA285936	6.75134
tenoxicam	FDA131279	6.75132
Bleomycin sulfate	FDA959908	6.73019
amoxicillin	FDA129983	6.71338
cyanocobalamin	FDA756799	6.69711
mepartricin	FDA131728	6.6633
Verteporfin	FDA959906	6.55316
aminocaproic acid	FDA129978	6.53233
ebselen	FDA131701	6.5263
TOCAINIDE	FDA286005	6.51516
not available	FDA285769	6.50303
Prostaglandin E1	FDA285959	6.47082
not available	FDA957618	6.42952
triamcinolone	FDA130301	6.41968
Amantadine hydrochloride	FDA129974	6.41447
ZAFIRLUKAST	FDA285896	6.40503
linezolid	FDA285956	6.38817
droperidol	FDA131080	6.36114
aceclidine hydrochloride, ACECLIDINE	FDA131108	6.34818
hydrastinine hydrochloride	FDA130095	6.33977
nelarabin	FDA756755	6.33739
not available	FDA255800	6.33087
levodopa	FDA130191	6.3053
(+)naproxen, NAPROXEN(+)	FDA130714	6.28222
celecoxib	FDA130335	6.26655
mycophenolate mofetil	FDA285688	6.26191
colforsin	FDA130235	6.25837
lornoxicam	FDA756869	6.25021
not available	FDA255770	6.23741
Alaproclate hydrochloride, ALAPROCLATE	FDA131522	6.22646
Diclofenac sodium	FDA130780	6.20005
orphenadrine citrate	FDA130728	6.1902
Oxandrolone	FDA967096	6.18756
Phenytoin sodium	FDA130891	6.16504
Carbachol	FDA130005	6.09715
diloxanide furoate	FDA756843	6.08902
bitoscanate	FDA756971	6.07047
cephapirin sodium	FDA130013	6.03544
moguisteine	FDA756994	5.99848
pyridoxine	FDA255856	5.98598
bucetin	FDA757011	5.95449
fulvestrant	FDA756752	5.94156
doxepin hydrochloride	FDA130668	5.92426
pefloxacine mesylate	FDA518631	5.87045
trimethadione	FDA255797	5.85705
pimethixene maleate	FDA131102	5.83483
alpha-tochopheryl acetate	FDA130065	5.82702
etodolac	FDA131082	5.82035
ceftriaxone sodium trihydrate	FDA756806	5.81577
phthalylsulfacetamide	FDA735835	5.81239
not available	FDA285943	5.80002
ezetimibe	FDA131678	5.78739
acetophenazine maleate	FDA756857	5.78154
hydroxychloroquine sulfate	FDA131747	5.7583
ziprasidone mesylate	FDA756846	5.74218
rebamipide	FDA285920	5.69058
not available	FDA955229	5.67281
mebendazole	FDA131099	5.60296
thiodiglycol	FDA131499	5.5985
Trifluoperazine dihydrochloride, TRIFLUOPERAZINE HYDROCHLORIDE	FDA130630	5.56623
cloperastine hydrochloride	FDA131395	5.56553
ivermectin	FDA756868	5.55986
lithium citrate	FDA757073	5.55005
picolamine	FDA757041	5.5471
Cefacetrile	FDA957925	5.53291
Trazodone hydrochloride	FDA131276	5.52344
prednisolone sodium phosphate	FDA756853	5.50375
levobunolol hydrochloride	FDA735612	5.46544
Hydrochlorothiazide	FDA130842	5.43879
flopropione	FDA130371	5.40577
Pramipexole	FDA915009	5.39903
sodium meclofenamate, MECLOFENAMATE SODIUM	FDA130692	5.3664
ancitabine hydrochloride	FDA735569	5.35337
Aprepitant	FDA914997	5.35156
azaperone	FDA735769	5.34462
not available	FDA957601	5.34321
pyronaridine tetraphosphate	FDA756999	5.30938
fenoterol hydrobromide	FDA131083	5.30247
desoxycorticosterone acetate	FDA130770	5.30221
cefaclor	FDA130960	5.3014
lonidamine	FDA757034	5.27728
acetyl-l-leucine	FDA131176	5.26443
quinestrol	FDA756900	5.25563
trioxsalen	FDA130042	5.23897
hydroxyprogesterone caproate	FDA130847	5.23275
mexeneone	FDA757059	5.22632
imipenem	FDA255801	5.21826
Formoterol fumarate dihydrate	FDA959933	5.21684
cephalothin sodium	FDA86898	5.21093
foscarnet sodium	FDA131188	5.20623
garaxolone	FDA914985	5.19003
nefopam	FDA131117	5.18079
sparteine sulfate	FDA130046	5.16341
THIP hydrochloride, GABOXADOL HYDROCHLORIDE	FDA131372	5.15812
aminohippuric acid	FDA131250	5.14665
estradiol valerate	FDA130809	5.12581
benzbromarone	FDA255711	5.11522
nebivolol hydrochloride	FDA756980	5.10412
eplerenore	FDA914983	5.06841
erdosteine	FDA757024	5.06818
bisoprolol fumarate	FDA735853	5.06367
not available	FDA285680	5.05886
not available	FDA285841	5.05757
dixanthogen	FDA757062	5.04379
trichlorfon	FDA255620	4.98176
phenformin hydrochloride	FDA255676	4.91694
octodrine	FDA735564	4.88936
oxybutynin chloride	FDA255686	4.88663
ribostamycin sulfate	FDA131408	4.88106
colistin sulfate	FDA756866	4.86269
oxiniacic acid	FDA757007	4.85487
(E/Z)-Flupentixol Dihydrochloride	FDA254960	4.84733
irinotecan hydrochloride	FDA285803	4.81121
topiramate	FDA285952	4.77808
tiapride hydrochloride	FDA131261	4.778
ronidazole	FDA131133	4.7754
mephenesin	FDA131120	4.75105
fexofenadine hydrochloride	FDA285911	4.7038
Rolipram	FDA255228	4.69399
palmidrol	FDA754260	4.68624
pregabalin	FDA735555	4.6668
erythromycin estolate	FDA131144	4.66312
letrozole	FDA285804	4.66055
Calcifediol	FDA754229	4.65333
not available	FDA255944	4.64417
(Â±)-Atenolol, ATENOLOL	FDA131111	4.62829
chromocarb	FDA735522	4.60915
carbenoxolone sodium	FDA131178	4.58187
metampicillin sodium	FDA131200	4.56164
not available	FDA955217	4.51415
eprobemide	FDA756966	4.51077
penciclovir	FDA285806	4.50776
prasterone	FDA756970	4.47337
tranexamic acid	FDA131193	4.46692
isoetharine mesylate	FDA255929	4.46325
ramelteon	FDA735552	4.46284
toltrazuril	FDA735806	4.45238
DEXBROMPHENIRAMINE MALEATE	FDA285934	4.43131
pantoprazole	FDA285797	4.42984
not available	FDA955215	4.41759
Erlotinib	FDA751824	4.40666
amorolfine hydrochloride	FDA285966	4.38521
camylofine dihydrochloride	FDA757015	4.34171
secnidazole	FDA285847	4.32891
folic acid	FDA735758	4.31055
diacetamate	FDA756969	4.3088
not available	FDA957559	4.30494
sodium 5-ethyl-5-(3-methylbutyl)-2,6-dioxo-1H-pyrimidin-4-olate	FDA967102	4.2984
not available	FDA154062	4.28431
bucladesine	FDA131245	4.27509
estropipate	FDA735599	4.26841
trimetozine	FDA131553	4.26103
florfenicol	FDA756842	4.21878
calcium gluceptate	FDA757072	4.20526
triacetin	FDA130686	4.19056
levocarnitine propionate hydrochloride	FDA756798	4.18535
not available	FDA285924	4.13017
not available	FDA957536	4.12005
ciprofibrate	FDA735757	4.09753
milnacipran hydrochloride	FDA756916	4.0966
allylisothiocyanate	FDA756794	4.07883
chloroxylenol	FDA130026	4.0712
not available	FDA957611	4.0558
ranolazine	FDA735550	4.04982
not available	FDA957629	4.03137
not available	FDA285608	4.01459
clindamycin palmitate hydrochloride	FDA735712	4.00804
teniposide	FDA131464	4.00229
temozolomide, TEMOZOLAMIDE	FDA756756	3.91717
testosterone propionate	FDA131013	3.91311
not available	FDA285898	3.90304
not available	FDA957612	3.90263
not available	FDA285992	3.88126
trospium chloride	FDA756957	3.85788
docetaxel	FDA756744	3.85648
tobramycin	FDA130961	3.84109
propantheline bromide	FDA130913	3.84071
L(-)-Norepinephrine bitartrate	FDA130720	3.83261
not available	FDA955210	3.83027
azelastine hydrochloride	FDA285834	3.80191
zolpidem	FDA285991	3.77585
sumatriptan succinate	FDA286004	3.76898
not available	FDA285853	3.73461
Hydromorphone hydrochloride	FDA967089	3.70675
fenoldipam mesylate	FDA756758	3.69863
not available	FDA285976	3.67975
Glipizide	FDA254901	3.6692
dimesna	FDA757010	3.66727
benzydamine hydrochloride	FDA255688	3.66087
dyphylline	FDA130670	3.61898
not available	FDA955211	3.60509
mangafodipir trisodium	FDA756962	3.57773
methylphenidate hydrochloride	FDA756810	3.57099
Taxol, PACLITAXEL	FDA131388	3.5564
not available	FDA285960	3.54552
mechlorethamine	FDA130690	3.54195
carbinoxamine maleate	FDA130008	3.5062
torsemide	FDA131745	3.48992
panthenol (dl)	FDA285870	3.47427
Oseltamivir	FDA915008	3.42786
atracurium besylate	FDA756849	3.42276
not available	FDA955220	3.42259
trimetazidine dihydrochloride	FDA255814	3.42235
not available	FDA285979	3.42227
Ethylmorphine	FDA967084	3.41289
not available	FDA955206	3.41198
taurine	FDA735787	3.39455
prasugrel	FDA756896	3.39455
ethotoin	FDA756878	3.38348
choline chloride	FDA130145	3.37676
norfloxacin	FDA130724	3.36182
oxybendazole, OXIBENDAZOLE	FDA131353	3.36037
not available	FDA957605	3.33939
warfarin	FDA130278	3.32428
cinchonidine	FDA130987	3.30784
digitoxin	FDA130787	3.30584
ipratropium bromide	FDA756854	3.28534
EFAVIRENZ	FDA285961	3.27379
cilostazol	FDA285886	3.27159
not available	FDA285772	3.26912
pentetic acid	FDA756769	3.26118
alclometazone dipropionate	FDA735633	3.24786
parachlorophenol	FDA130705	3.24394
not available	FDA285766	3.22931
not available	FDA955225	3.21887
not available	FDA957575	3.17059
doxapram hydrochloride	FDA756908	3.13776
not available	FDA957541	3.12231
flufenamic acid	FDA131012	3.11517
pioglitazone hydrochloride	FDA131480	3.11213
not available	FDA285776	3.08385
thalidomide	FDA131727	3.08172
symclosene	FDA756803	3.08094
methenamine	FDA130869	3.08081
meprylcaine hydrochloride	FDA756733	3.07827
vardenafil hydrochloride	FDA735775	3.06666
voriconazole	FDA756904	3.04416
editol	FDA756786	3.02744
efloxate	FDA757009	2.99284
moxalactam disodium	FDA130711	2.98309
etidronate disodium	FDA255972	2.98055
granisetron hydrochloride	FDA756907	2.97331
Oxprenolol hydrochloride	FDA957954	2.97289
not available	FDA957582	2.96926
Udenafil	FDA957934	2.96297
not available	FDA957573	2.95054
phenazopyridine hydrochloride	FDA130722	2.94566
not available	FDA285669	2.91313
cholecalciferol	FDA130986	2.89062
mephentermine sulfate	FDA131329	2.86811
flucytosine	FDA285856	2.86184
ramipril	FDA131762	2.81147
dibucaine hydrochloride	FDA130779	2.80498
enalaprilat	FDA756856	2.77993
meglumine	FDA757068	2.77524
gabapentin	FDA735502	2.77504
thioguanine	FDA130210	2.74928
ibandronate sodium	FDA756736	2.74316
sulisobenzone	FDA756740	2.72767
not available	FDA285995	2.72767
not available	FDA957550	2.72
metaraminol bitartrate	FDA255663	2.68272
sulfathiazole	FDA130946	2.68148
dexibuprofen	FDA285626	2.68141
creatinine	FDA130256	2.66736
Pralidoxime iodide, PRALIDOXIME CHLORIDE	FDA131209	2.66292
not available	FDA957633	2.65563
ethambutol hydrochloride	FDA130812	2.65319
eletriptan hydrobromide	FDA735885	2.63952
amrinone, INAMRINONE	FDA131259	2.6263
polymyxin b sulfate	FDA130897	2.61026
acetanilide	FDA130125	2.60337
cefalonium	FDA756972	2.54713
fenamisal, PHENYL AMINOSALICYLATE	FDA131027	2.52533
levosimendan	FDA756950	2.52366
flurofamide	FDA756737	2.46933
benzyl benzoate	FDA131236	2.45844
enrofloxacin	FDA735746	2.45662
levocetirizine dihydrochloride	FDA756728	2.43132
ellagic acid	FDA131223	2.42488
benzthiazide	FDA129996	2.40878
dexamethasone	FDA130774	2.39014
mepiroxol	FDA756973	2.37882
dexamethasone acetate	FDA130775	2.37085
lobeline hydrochloride	FDA130926	2.36239
nitroglycerin	FDA756940	2.3613
R(+)-Lisuride hydrogen maleate	FDA254940	2.36063
paromomycin sulfate	FDA131319	2.35564
fumaric acid	FDA530380	2.34772
meropenem	FDA756921	2.33024
nilutamide	FDA131481	2.32897
Bortezomib	FDA915002	2.3259
Amiodarone hydrochloride	FDA130213	2.31964
mifepristone	FDA735824	2.31806
drospirenone	FDA756873	2.30019
pranoprofen	FDA756997	2.28908
glycopyrrolate	FDA756859	2.28011
Hydrocodone (+)-bitartrate salt	FDA967088	2.27983
Naftopidil dihydrochloride, NAFTOPIDIL	FDA254883	2.27627
Progabide	FDA957933	2.2489
not available	FDA285925	2.23862
antipyrine	FDA129988	2.21823
Bimatoprost	FDA957935	2.19931
not available	FDA285862	2.19116
Pentoxifylline	FDA131364	2.18813
not available	FDA286018	2.17943
orbifloxacin	FDA131772	2.17178
trandolapril	FDA735524	2.16205
Octreotide	FDA957963	2.14973
gliclazide	FDA131527	2.12936
ethamivan	FDA255789	2.09676
pregnenolone succinate	FDA735862	2.09613
not available	FDA957546	2.07081
Fosamprenavir Calcium Salt	FDA957980	2.06881
metergoline	FDA129962	2.06511
Cimetidine	FDA130357	2.05449
remacemide hydrochloride	FDA48026	2.04236
not available	FDA285939	2.03191
sodium dehydrocholate, DEHYDROCHOLATE SODIUM	FDA130772	2.02716
paliperidone	FDA756747	2.02614
capecitabine	FDA756742	2.02544
Codeine	FDA967081	2.01857
not available	FDA957563	2.0037
retinyl palmitate	FDA131766	1.98873
ciprofloxacin	FDA130117	1.9729
fomepizole hydrochloride, FOMEPIZOLE	FDA285621	1.96671
sulpiride	FDA129915	1.96228
netilmicin sulfate	FDA735792	1.94618
not available	FDA955274	1.93933
fenbufen	FDA131084	1.92026
telmisartan	FDA285879	1.90917
nanofin	FDA756991	1.90787
bufexamac	FDA131593	1.89808
climbazole	FDA757006	1.87855
adrenaline bitartrate, EPINEPHRINE BITARTRATE	FDA130804	1.86436
chlorophyllide cu complex na salt	FDA756955	1.86389
3-methyl-1-phenyl-2-pyrazolin-5-one (mci-186), EDARAVONE	FDA80490	1.85953
arginine hydrochloride	FDA756914	1.84901
not available	FDA957630	1.82668
isosorbide mononitrate	FDA756954	1.80814
(2S,5R,6R)-6-(2,2-dimethyl-5-oxo-4-phenyl-1-imidazolidinyl)-3,3-dimethyl-7-oxo-4-thia-1-azabicyclo[3.2.0]heptane-2-carboxylic acid	FDA957965	1.80261
aripiprazole	FDA756864	1.80249
Ranitidine hydrochloride	FDA131130	1.79699
not available	FDA285984	1.79109
R(-)-Apomorphine hydrochloride	FDA254987	1.77314
acamprosate calcium	FDA757075	1.71654
praziquantel	FDA130898	1.7008
ceforanide	FDA756880	1.69855
rutin	FDA735675	1.69294
guaiacol	FDA757060	1.68967
acetaminophen	FDA129967	1.68795
actarit	FDA285967	1.64946
not available	FDA285800	1.63839
not available	FDA285949	1.63118
2,6-di-t-butyl-4-methylphenol, BUTYLATED HYDROXYTOLUENE	FDA131759	1.6228
homosalate	FDA735871	1.61905
not available	FDA285838	1.61542
diethylcarbamazine citrate	FDA130784	1.61111
chlorpyrifos	FDA131641	1.57686
not available	FDA957607	1.5692
labetalol hydrochloride	FDA131327	1.52987
chloramphenicol	FDA131175	1.50641
not available	FDA285941	1.49293
sulfaquinoxaline sodium	FDA131124	1.48484
azithromycin	FDA130225	1.47968
deracoxib	FDA735514	1.47968
cholesterol	FDA130990	1.47904
Lubiprostone	FDA957948	1.45279
RIFAPENTINE	FDA285885	1.44393
acedoben	FDA756992	1.42955
fluvoxamine maleate	FDA756898	1.34752
not available	FDA957557	1.34391
apramycin sulfate	FDA735493	1.34
sodium phenylacetate	FDA756939	1.33422
acarbose	FDA735528	1.33358
levofloxacin	FDA131508	1.32418
vincristine sulfate	FDA735617	1.31958
procyclidine hydrochloride	FDA130909	1.28991
Saquinavir Mesylate	FDA957984	1.24482
arsanilic acid	FDA735801	1.2428
aminohydroxybutyric acid	FDA131244	1.22995
lamotrigine	FDA285717	1.22471
simvastatin	FDA131507	1.21861
not available	FDA255862	1.21118
not available	FDA955239	1.19907
pipobroman	FDA131356	1.1976
Clozapine	FDA129949	1.19477
Dopamine hydrochloride	FDA130799	1.17698
not available	FDA286020	1.16289
alpha-tochopherol	FDA131147	1.15651
clopidogrel sulfate	FDA129932	1.15611
Vapreotide acetate salt	FDA959913	1.14804
chlortetracycline, CHLORTETRACYCLINE HYDROCHLORIDE	FDA130412	1.13678
Zonisamide	FDA915006	1.12544
lefunamide, LEFLUNOMIDE	FDA130157	1.10766
penicillin g potassium	FDA130702	1.07321
not available	FDA255609	1.05007
cefpiramide	FDA756887	1.0433
L-Cysteine, N-Acetyl-	FDA129971	1.03969
MEROPENEM	FDA285756	1.02437
nafcillin sodium	FDA131719	1.02355
Disopyramide phosphate	FDA130797	1.01418
Spirapril Hydrochloride	FDA957978	1.00365
lamivudine	FDA756905	0.973092
Propofol	FDA255022	0.968675
famprofazone	FDA757022	0.960128
tylosin tartrate	FDA735525	0.957532
Molindone Hydrochloride	FDA957982	0.929855
hycanthone	FDA131324	0.928612
felbinac	FDA285904	0.923737
not available	FDA255637	0.921582
not available	FDA285697	0.908733
guanadrel sulfate	FDA756731	0.882405
not available	FDA957567	0.880199
benzonatate	FDA756785	0.877908
dehydrocholic acid	FDA131067	0.860487
strychnine	FDA130049	0.852234
betamethasone acetate	FDA756851	0.847536
flunixin meglumine	FDA735618	0.83479
not available	FDA957549	0.826321
not available	FDA285977	0.820242
nalbuphine hydrochloride	FDA131103	0.808517
sodium p-aminosalicylate, AMINOSALICYLATE SODIUM	FDA129980	0.793368
L(-)-Norephedrine, PHENYLPROPANOLAMINE HYDROCHLORIDE	FDA130890	0.782505
propoxur	FDA131649	0.780246
brucine	FDA130975	0.778926
oltipraz	FDA756996	0.764264
betaxalol hydrochloride	FDA255716	0.758457
Palonosetron Hydrochloride	FDA811668	0.751337
zalcitabine	FDA285962	0.742336
Frovatriptan Succinate Monohydrate	FDA957981	0.732331
acesulfame potassium	FDA756775	0.708525
nefiracetam	FDA757050	0.686782
sildenafil, SILDENAFIL CITRATE	FDA131467	0.685462
fasudil hydrochloride	FDA754405	0.676294
sertraline hydrochloride	FDA285789	0.672725
dantrolene sodium	FDA131312	0.664528
aminacrine	FDA129933	0.654302
Calcipotriene	FDA914996	0.6477
not available	FDA957593	0.635834
griseofulvin	FDA130753	0.626062
Bromazepam	FDA967080	0.611747
Yohimbine hydrochloride	FDA130052	0.610951
ketorolac tromethamine	FDA131399	0.589656
Salmeterol	FDA915001	0.574202
terconazole	FDA756792	0.568286
clobetasol propionate	FDA131393	0.554055
Pimecrolimus	FDA957950	0.553963
not available	FDA285755	0.54897
tamsulosin hydrchloride	FDA756942	0.548394
podofilox	FDA130203	0.537455
not available	FDA285830	0.536943
17-Desacetyl Norgestimate	FDA957928	0.523231
Desipramine hydrochloride	FDA130107	0.483977
donepizil hydrochloride, DONEPEZIL HYDROCHLORIDE	FDA131568	0.482854
Bretylium tosylate	FDA254849	0.476205
closantel	FDA285810	0.459029
not available	FDA955209	0.458815
idramantone	FDA757033	0.446181
Chlorpropamide	FDA130029	0.435338
troxerutin	FDA735530	0.433332
cepharanthine	FDA735543	0.433332
Tiotropium Br	FDA915033	0.414957
Clomipramine hydrochloride	FDA130186	0.394427
rizatriptan benzoate	FDA756823	0.34045
Prostaglandin I2áNa, Prostacyclin	FDA957937	0.316911
adipic acid	FDA756820	0.304849
clarithromycin	FDA129924	0.272647
bambuterol hydrochloride	FDA255708	0.259856
vorinostat	FDA756741	0.246869
pantethine	FDA757012	0.236444
sodium oxybate	FDA756923	0.223239
lofexidine hydrochloride	FDA756750	0.193108
prednisolone hemisuccinate	FDA756838	0.170621
not available	FDA957603	0.166196
LAMIVUDINE	FDA285629	0.150661
methylatropine nitrate	FDA732232	0.150661
(Â±)-Sulpiride	FDA254962	0.133215
gemifloxacin mesylate	FDA735548	0.131999
vidarabine	FDA131742	0.130909
not available	FDA957584	0.120871
cinoxacin	FDA130033	0.109739
niflumic acid	FDA131185	0.0992664
estradiol cypionate	FDA130808	0.0735613
fluvastatin	FDA255968	0.0456219
Chlorzoxazone	FDA130031	0.0373836
tiopronin	FDA285927	0.035023
medrysone	FDA130694	0.0335838
not available	FDA957534	0.0243156
dihydrostreptomycin sulfate	FDA130790	0.0192948
citiolone	FDA255871	0.0165188
Benserazide hydrochloride	FDA129993	0.0133967
equilin	FDA130069	0.00120592
diphenylpyraline hydrochloride	FDA123991	0
edoxudine	FDA129885	0
thiabendazole	FDA129900	0
GABA, gamma-AMINOBUTYRIC ACID	FDA129905	0
naloxone hydrochloride	FDA129906	0
hydroquinidine	FDA129912	0
khellin	FDA129920	0
aminothiazole	FDA129922	0
tryptophan	FDA129923	0
reserpine	FDA129934	0
guanidine carbonate, GUANIDINE HYDROCHLORIDE	FDA129948	0
cefamandole sodium	FDA129953	0
acetaminosalol	FDA129958	0
Acetazolamide	FDA129968	0
acetohydroxamic acid	FDA129969	0
Allopurinol	FDA129972	0
Amiloride hydrochloride	FDA129976	0
potassium p-aminobenzoate	FDA129977	0
amprolium	FDA129985	0
anthralin	FDA129987	0
beclomethasone dipropionate	FDA129992	0
benzocaine	FDA129995	0
bisacodyl	FDA130001	0
cefazolin sodium	FDA130011	0
chlorocresol	FDA130022	0
clidinium bromide	FDA130035	0
clofibric acid	FDA130037	0
emetine, EMETINE DIHYDROCHLORIDE	FDA130038	0
resorcinol	FDA130043	0
(Â±)-Octopamine hydrochloride, OCTOPAMINE HYDROCHLORIDE	FDA130047	0
aconitine	FDA130050	0
beta-carotene	FDA130057	0
penicillamine	FDA130068	0
piperine	FDA130078	0
cytarabine	FDA130082	0
glutathione	FDA130106	0
fendiline hydrochloride	FDA130108	0
enoxolone	FDA130143	0
Cyclosporin A, CYCLOSPORINE	FDA130156	0
amifostine	FDA130161	0
hydroxyprogesterone	FDA130175	0
cortisone	FDA130176	0
Chlomezanone, CHLORMEZANONE	FDA130182	0
Amoxapine	FDA130187	0
nicotine ditartrate, NICOTINE BITARTRATE	FDA130190	0
Melatonin	FDA130197	0
carmustine	FDA130215	0
(-)-menthol, LEVOMENTHOL	FDA130224	0
ergonovine maleate	FDA130236	0
methacycline hydrochloride	FDA130242	0
Pinacidil	FDA130245	0
nimustine	FDA130246	0
pentetrazole, PENTYLENETETRAZOL	FDA130248	0
melphalan	FDA130250	0
(-)-Ephedrine, N-Methyl, N-METHYL (-)EPHEDRINE [1R,2S]	FDA130257	0
hydroxytoluic acid	FDA130260	0
triamcinolone acetonide	FDA130283	0
Iproniazid phosphate, IPRONIAZID SULFATE	FDA130294	0
benfluorex hydrochloride	FDA130296	0
gallic acid	FDA130311	0
acemetacin	FDA130333	0
famciclovir	FDA130342	0
hexestrol	FDA130353	0
acebutolol hydrochloride	FDA130355	0
Pargyline hydrochloride	FDA130390	0
oleandomycin phosphate	FDA130399	0
tolazoline hydrochloride	FDA130414	0
mecysteine hydrochloride	FDA130609	0
dimethadione	FDA130666	0
doxycycline hydrochloride	FDA130669	0
ketoconazole	FDA130683	0
metoprolol tartrate	FDA130706	0
tolnaftate	FDA130707	0
Nortriptyline hydrochloride	FDA130726	0
oxacillin sodium	FDA130729	0
Dihydroergotamine methanesulfonate, DIHYDROERGOTAMINE MESYLATE	FDA130734	0
praesterone acetate, PRASTERONE ACETATE	FDA130740	0
colchicine	FDA130756	0
colistimethate sodium	FDA130757	0
cortisone acetate	FDA130758	0
cromolyn sodium	FDA130761	0
cyclopentolate hydrochloride	FDA130763	0
D-Cycloserine, CYCLOSERINE (D)	FDA130765	0
dapsone	FDA130769	0
dicloxacillin sodium	FDA130781	0
diflunisal	FDA130786	0
Diphenhydramine hydrochloride	FDA130792	0
metacetamol	FDA130793	0
dioxybenzone	FDA130794	0
Dipyridamole	FDA130795	0
doxylamine succinate	FDA130800	0
ephedrine (1r,2s) hydrochloride	FDA130803	0
erythromycin ethylsuccinate	FDA130806	0
ethionamide	FDA130814	0
Haloperidol	FDA130834	0
hexylresorcinol	FDA130838	0
hydralazine hydrochloride	FDA130841	0
Imipramine hydrochloride	FDA130851	0
Neostigmine bromide	FDA130880	0
(+)-Pilocarpine hydrochloride, PILOCARPINE NITRATE	FDA130892	0
piperazine	FDA130895	0
piroxicam	FDA130896	0
prednisolone	FDA130900	0
prednisolone acetate	FDA130901	0
prednisone	FDA130902	0
Primidone	FDA130904	0
Procainamide hydrochloride	FDA130906	0
procaine hydrochloride	FDA130907	0
Prochlorperazine dimaleate, PROCHLORPERAZINE EDISYLATE	FDA130908	0
Promethazine hydrochloride	FDA130912	0
propylthiouracil	FDA130915	0
(+)-Pseudoephedrine	FDA130916	0
pyrimethamine	FDA130920	0
nalidixic acid	FDA130925	0
spectinomycin hydrochloride	FDA130933	0
spironolactone	FDA130934	0
streptomycin sulfate	FDA130935	0
streptozosin	FDA130936	0
sulfabenzamide	FDA130937	0
sulfacetamide	FDA130938	0
sulfadiazine	FDA130939	0
sulfamethazine	FDA130941	0
sulfapyridine	FDA130944	0
sulfasalazine	FDA130945	0
sulfinpyrazone	FDA130947	0
sulfisoxazole	FDA130948	0
Sulindac	FDA130949	0
terbutaline hemisulfate	FDA130951	0
Tetracaine hydrochloride	FDA130952	0
tetracycline hydrochloride	FDA130953	0
tetrahydrozoline hydrochloride	FDA130954	0
thiothixene	FDA130959	0
adenine	FDA130968	0
aspirin	FDA131006	0
phenylbutyric acid, SODIUM PHENYLBUTYRATE	FDA131028	0
escitalopram oxalate	FDA131042	0
glafenine	FDA131077	0
drofenine hydrochloride	FDA131078	0
probucol	FDA131098	0
protoporphyrin ix	FDA131100	0
minaprine hydrochloride	FDA131106	0
Sulfaphenazole	FDA131122	0
sulfaguanidine	FDA131125	0
flunisolide	FDA131152	0
flumethasone	FDA131160	0
Tolazamide	FDA131164	0
capreomycin sulfate	FDA131172	0
cloxacillin sodium	FDA131181	0
piperidolate hydrochloride	FDA131190	0
ethosuximide	FDA131191	0
cefoxitin sodium	FDA131197	0
cefuroxime sodium	FDA131199	0
Nordihydroguaiaretic acid	FDA131210	0
salicin	FDA131231	0
5-azacytidine, AZACITIDINE	FDA131237	0
dinitolmide	FDA131242	0
retinyl acetate	FDA131246	0
ambroxol hydrochloride	FDA131257	0
benfotiamine	FDA131268	0
piromidic acid	FDA131285	0
clofoctol	FDA131310	0
enoxacin	FDA131313	0
isoxicam	FDA131326	0
midodrine hydrochloride	FDA131334	0
nadolol	FDA131335	0
Pergolide methanesulfonate, PERGOLIDE MESYLATE	FDA131337	0
hydrocortisone butyrate	FDA131339	0
oxethazaine	FDA131342	0
Hexamethonium dichloride, HEXAMETHONIUM BROMIDE	FDA131343	0
dipyrone	FDA131344	0
thiotepa	FDA131348	0
tetroquinone	FDA131349	0
sulfanitran	FDA131350	0
d-phenylalanine	FDA131355	0
nafronyl oxalate	FDA131358	0
nabumetone	FDA131373	0
bleomycin (bleomycin b2 shown)	FDA131375	0
loratadine	FDA131378	0
amcinonide	FDA131381	0
bupivacaine hydrochloride	FDA131382	0
ramifenazone	FDA131384	0
cyproterone	FDA131396	0
perphenazine	FDA131405	0
propafenone hydrochloride	FDA131406	0
thioctic acid	FDA131409	0
tulobuterol, TULOBUTEROL HYDROCHLORIDE	FDA131414	0
2-thiouracil	FDA131416	0
fluconazole	FDA131417	0
quinapril hydrochloride	FDA131477	0
meloxicam, MELOXICAM SODIUM	FDA131485	0
oxcarbazepine	FDA131496	0
orlistat	FDA131503	0
ornithine aketoglutarate, ORNITHINE HYDROCHLORIDE	FDA131504	0
losartan	FDA131505	0
valdecoxib	FDA131512	0
zoxazolamine	FDA131513	0
dipyrocetyl	FDA131515	0
hydroquinone	FDA131517	0
acetriazoic acid	FDA131518	0
mepivacaine hydrochloride	FDA131528	0
trifluridine	FDA131546	0
betamipron	FDA131561	0
miglitol	FDA131562	0
Metoclopramide hydrochloride	FDA131565	0
vincamine	FDA131571	0
compactin, MEVASTATIN	FDA131584	0
malathion	FDA131609	0
dibutyl phthalate	FDA131665	0
methoprene (s)	FDA131670	0
valsartan	FDA131676	0
moxifloxacin hydrochloride	FDA131680	0
cotinine	FDA131684	0
almotriptan	FDA131687	0
racephedrine hydrochloride	FDA131692	0
tubocurarine chloride	FDA131696	0
budesonide	FDA131720	0
megestrol acetate	FDA131722	0
benazepril hydrochloride	FDA131737	0
methotrexate	FDA131739	0
Aminopterin	FDA131763	0
trichlormethine, TRICHLORMETHINE HYDROCHLORIDE	FDA131779	0
gatifloxacin	FDA131797	0
(Â±)-Verapamil hydrochloride, VERAPAMIL HYDROCHLORIDE	FDA131810	0
salicylanilide	FDA131812	0
dimercaptopropanol, DIMERCAPROL	FDA131817	0
salsalate	FDA131825	0
dimenhydrinate	FDA138100	0
chlorpheniramine maleate	FDA151477	0
UK 14,304	FDA254873	0
H-DL-beta-(3,4-Dihydroxyphenyl)-DL-Ser-OH	FDA254885	0
Succinylcholine chloride	FDA254930	0
N-Acetylprocainamide hydrochloride, ACECAINIDE HYDROCHLORIDE	FDA254931	0
O-Phospho-L-serine, DEXFOSFOSERINE	FDA255000	0
L-Cysteine hydrochloride	FDA255026	0
Ketanserin tartrate	FDA255143	0
Buspirone hydrochloride	FDA255169	0
3-Tropanyl-indole-3-carboxylate hydrochloride, TROPISETRON HYDROCHLORIDE	FDA255175	0
R(-)-Deprenyl hydrochloride	FDA255191	0
Nialamide	FDA255227	0
meticrane	FDA255608	0
benoxinate hydrochloride	FDA255621	0
acenocoumarol	FDA255634	0
not available	FDA255635	0
not available	FDA255642	0
clindamycin hydrochloride	FDA255644	0
not available	FDA255646	0
ornidazole	FDA255658	0
not available	FDA255694	0
Dinoprost	FDA255763	0
pantothenic acid(d) na salt	FDA255771	0
not available	FDA255788	0
bromperidol	FDA255794	0
not available	FDA255805	0
tetramizole hydrochloride	FDA255812	0
not available	FDA255824	0
not available	FDA255872	0
not available	FDA255879	0
chlorcyclizine hydrochloride	FDA255913	0
not available	FDA255915	0
furaltadone	FDA255934	0
not available	FDA285610	0
not available	FDA285622	0
not available	FDA285627	0
not available	FDA285628	0
not available	FDA285634	0
not available	FDA285635	0
not available	FDA285649	0
not available	FDA285650	0
not available	FDA285651	0
not available	FDA285656	0
not available	FDA285659	0
not available	FDA285666	0
proparacaine hydrochloride	FDA285667	0
not available	FDA285677	0
not available	FDA285678	0
EXEMESTANE	FDA285682	0
not available	FDA285687	0
not available	FDA285698	0
not available	FDA285700	0
not available	FDA285718	0
not available	FDA285721	0
ribavirin	FDA285723	0
not available	FDA285728	0
not available	FDA285731	0
chlorquinaldol	FDA285753	0
not available	FDA285768	0
not available	FDA285780	0
VECURONIUM BROMIDE	FDA285790	0
carmofur	FDA285794	0
anastrozole	FDA285798	0
sotalol hydrochloride	FDA285807	0
not available	FDA285811	0
not available	FDA285813	0
doxofylline	FDA285814	0
not available	FDA285818	0
not available	FDA285821	0
ESMOLOL HYDROCHLORIDE	FDA285822	0
milrinone	FDA285823	0
irsogladine maleate	FDA285828	0
desloratidine	FDA285832	0
quetiapine	FDA285840	0
amitraz	FDA285844	0
ampiroxicam	FDA285849	0
oxaprozin	FDA285858	0
benzyl alcohol	FDA285863	0
not available	FDA285874	0
rabeprazole sodium	FDA285877	0
not available	FDA285892	0
VINDESINE SULFATE	FDA285895	0
camphor (1r)	FDA285905	0
mesalamine	FDA285907	0
not available	FDA285915	0
hymechrome	FDA285918	0
itopride hydrochloride	FDA285919	0
toremiphene citrate	FDA285921	0
not available	FDA285922	0
not available	FDA285938	0
lomerizine hydrochloride	FDA285947	0
not available	FDA285980	0
not available	FDA285981	0
not available	FDA285982	0
Methyltestosterone	FDA285986	0
not available	FDA285989	0
CERIVASTATIN Na	FDA285999	0
zileuton	FDA286006	0
not available	FDA286009	0
not available	FDA286010	0
not available	FDA286014	0
stavudine	FDA36417	0
mebhydrolin naphthalenesulfonate	FDA70032	0
procodazole	FDA731140	0
miltefosine	FDA733011	0
adenosine	FDA733222	0
fluorescein	FDA735506	0
sarafloxacin hydrochloride	FDA735532	0
yohimbine hydrochloride	FDA735533	0
protionamide	FDA735542	0
cefditorin pivoxil	FDA735547	0
thiostrepton	FDA735553	0
flurothyl	FDA735557	0
ajmaline	FDA735563	0
carprofen	FDA735590	0
nadide	FDA735634	0
chlormadinone acetate	FDA735639	0
cefprozil	FDA735649	0
d-lactitol monohydrate	FDA735713	0
exemestane	FDA735728	0
rifampin	FDA735743	0
molsidomine	FDA735752	0
cefuroxime axetil	FDA735759	0
atomoxetine hydrochloride	FDA735778	0
trimebutine maleate	FDA735796	0
pancuronium bromide	FDA735818	0
vecuronium bromide	FDA735834	0
desoxymetasone	FDA735848	0
teicoplanin [a(2-1) shown]	FDA735851	0
cefpodoxime proxetil	FDA735866	0
doconexent	FDA754146	0
Flecainide acetate	FDA754156	0
cyclamic acid	FDA756716	0
propoxycaine hydrochloride	FDA756721	0
cefotetan	FDA756722	0
abacavir sulfate	FDA756730	0
vinorelbine	FDA756743	0
diaveridine	FDA756759	0
algestone acetophenide	FDA756761	0
finasteride	FDA756768	0
docosanol	FDA756771	0
casanthranol [cascaroside a shown]	FDA756797	0
viomycin sulfate	FDA756804	0
firocoxib	FDA756807	0
azilsartan kamedoxomil	FDA756809	0
eprodisate disodium	FDA756812	0
cinromide	FDA756822	0
ioxilan	FDA756828	0
levocarnitine	FDA756835	0
pipamperone	FDA756850	0
octisalate	FDA756861	0
riboflavin 5-phosphate sodium	FDA756862	0
risedronate sodium	FDA756865	0
mometasone furoate	FDA756875	0
dydrogesterone	FDA756879	0
azatadine maleate	FDA756882	0
ceftiofur hydrochloride	FDA756884	0
butoconazole	FDA756886	0
betazole hydrochloride	FDA756895	0
idoxuridine	FDA756906	0
ramoplanin [a2 shown; 2mm]	FDA756909	0
fluticasone propionate	FDA756912	0
[truncated: 123 more rows]

## Sheet: Table S2 FINAL
	Supplementary Table S2: IC50 and motility inhibition percentage values for all species assayed. The original prioritized hits are shaded in green (Group A) and orange (Group B)
	Compound name	UCSF SMDC ID	Azoles	Compounds of interest	Brugia pahangi (UCSF)		Onchocerca ochengi (BUEA)						Loa loa (BUEA)		Onchocerca volvulus (NYBC)				A. ceylanicum	T. muris
					Day 3		Adult Female Day 7		Adult Male Day 5		mf Day 5		mf Day 5		L3 Day 6		L5		Adult	Adult
					IC50 (µM)	% inhib at 10 µM	IC50 (µM)	% inhib at 10 µM	IC50 (µM)	% inhib at 10 µM	IC50 (uM)	% inhib at 10 µM	IC50 (µM)	% inhib at 10 µM	Molting IC50 (µM)	Molting % inhib at 10 µM	% inhibition of motility (conc.)	MTT % inhibition of viability (conc.)	30 µM, motility rating, 48 hours**	30 µM, motility rating, 48 hours**
	econazole nitrate	FDA131151	Y	A1	3.965	99.5964	-	22.05	-	26.15	-	-	-	-	-	-	-	-	0.25	0
	miconazole nitrate	FDA130708	Y	A2	3.3	95.514	-	0	-	100	-	0	-	-	-	100	-	-	0.75	0
	sulconazole nitrate	FDA131127	Y	A3	4.615	98.2595	-	26.21	-	99	-	-	-	-	-	-	-	-	0	0
	Sertaconazole nitrate	FDA915036	Y	A4	-	99.8453	-	20.8333	-	31.25	-	-	-	-	-	-	-	-	-	-
	clotrimazole	FDA131180	Y	A5	5.5	85.3076	-	8.33	-	100	-	0	-	-	-	82	-	-	-	-
	Itraconazole	FDA915021	Y	A6	-	79.7428	-	12.5	-	20.8333	-	-	-	-	-	-	-	-	-	-
	suloctidil	FDA131132	-	B1	3.658	98.6689	4.1	86.6667	5.5	100	7.7	63	4.1	100	-	100	100 (10uM)	100 (10uM)	-	-
	Tafenoquine Succinate	Tafenoquine Succinate	-	B10	14.1	63.0867	-	0	-	41.7	-	0	-	18.8	-	-	-	-	-	-
	primaquine diphosphate, PRIMAQUINE PHOSPHATE	FDA130903	-	B11	5.059	50.6902	1.33	100	0.4	100	-	0	18.52	50	-	-	100 (10uM)	100 (10uM)	-	-
	apomorphine hydrochloride	FDA129989	-	B12	-	53.2513	-	-	-	-	-	-	-	-	-	-	-	-	-	-
	Pimozide	FDA130109	-	B2	2.517	96.0492	-	12.5	-	95.835	-	-	-	-	-	100	-	-	-	-
	butamben	FDA129893	-	B3	-	66.2482	-	-	-	-	-	-	-	-	-	-	-	-	-	-
	clemizole hydrochloride	FDA149934	-	B4	6.51	78.2875	-	13.75	-	-	-	-	-	-	-	-	-	-	-	-
	Proroxan	Proroxan	-	B5	8.53333	65.1518	-	11	-	0	-	0	-	0	-	-	-	-	-	-
	saccharin	FDA130053	-	B6	-	57.1348	-	-	-	-	-	-	-	-	-	-	-	-	-	-
	ritonavir	FDA285663	-	B7	-	51.9074	-	-	-	-	-	-	-	-	-	-	-	-	-	-
	nifenazone	FDA131321	-	B8	-	49.6025	-	-	-	-	-	-	-	-	-	-	-	-	-	-
	levonordefrin	FDA131411	-	B9	-	53.5591	-	-	-	-	-	-	-	-	-	-	-	-	-	-
	Fenticonazole	reF379	Y		1.154	100	94.65	32	10.61	75	-	18	10 (dil. blood)	50	-	-	4.657 IC50 Day 21	0% @ 0.3 uM on Day 29	-	-
	Isoconazole	reF333	Y		3.8 on Day 2	100	30.8	57	0.55	100	-	37.5	10 (dil. blood)	33.3	-	-	2.381 IC50 Day 21	17% @ 0.3 uM on Day 29	-	-
	butaconazole nitrate	Aroian_102	Y		-	100% at 30 uM on Day 1	-	-	-	-	-	-	-	-	-	-	-	-	-	-
	tioconazole	FDA735884	Y		3.182	99.4699	-	13.75	-	100	-	-	-	-	-	-	-	-	-	-
	Posaconazole	FDA957927	Y		-	91.261	-	-	-	-	-	-	-	-	-	-	-	-	-	-
	Posaconazole	reF715	Y		0.1	82	>100 uM	38	6.06	79	-	75	>100 (dil. Blood)	-	-	-	57% @ 1 uM on Day 28	0% @ 10 uM on Day 29	-	-
	chlormidazole	FDA756979	Y		-	66.5615	-	48.7	-	-	-	-	-	-	-	-	-	-	-	-
	itraconazole	FDA756860	Y		-	55.8285	-	-	-	-	-	-	-	-	-	-	-	-	-	-
	dichlorophene, DICHLOROPHEN	FDA130499	-		-	99.9224	-	21.21	-	36.9	-	-	-	-	-	-	-	-	-	-
	Lercanidipine	FDA957610	-		-	99.8851	-	0	-	100	-	-	-	-	-	-	-	-	-	-
	Auranofin	FDA285624	-		0.7	99.8482	0.27	100	0.38	100	3	-	12.8	40.6	0.34	-	100 (3 uM) (Day 66, 6 days of treatment)	25 (3 uM) IC50 = 0.9 uM (Day 69, 6 days of treatment)	-	-
	hexetidine	FDA130288	-		-	99.8363	-	17.4107	-	63.0667	-	-	-	-	-	-	-	-	-	-
	Niclosamide Analog #1 N-(2-chloro-4-nitrophenyl)-2-hydroxybenzamide	ChemBridge5401798	-		2.6	99.8336	0.6035	99	0.6	100	2	100	0.91	100	-	-	-	-	-	-
	thimerosal	FDA130956	-		0.406	99.8187	0.05	100	1.2	100	-	-	-	-	-	-	-	-	-	-
	sorafenib p-toluensulfonate	FDA914977	-		-	99.7471	-	0	-	0	-	-	-	-	-	-	-	-	-	-
	salinomycin, sodium	FDA129926	-		0.6347	99.7124	0.29	84.7	0.1	100	-	-	-	-	-	-	-	-	-	-
	pyrithione zinc	FDA735729	-		0.09633	99.5281	2.88	96.07	0.09	100	-	-	-	-	-	-	-	-	-	-
	Tetrahydropyrvinium (THP)	SMDC755851	-		0.0033	99.5101	0.12	87	0.07	98	0.3	100	0.06	100	-	-	100 (10 uM and 59 (1 uM)	100 (10 uM and 36 (1 uM)	-	-
	phenylmercuric acetate	FDA130490	-		0.1791	99.3888	-	98.67	-	100	-	-	-	-	-	-	-	-	-	-
	methylene blue	FDA255764	-		1.059	99.3659	-	-	-	97	-	-	-	-	-	-	-	-	-	-
	thonzonium bromide	FDA756848	-		1.07	99.2819	-	47.08	-	100	-	-	-	-	-	-	-	-	-	-
	Tizoxanide	Tizoxanide	-		3.4	98.9536	4.16	93.3	5.47	97.2	7.739	63	1.63043	-	-	-	-	-	-	-
	menadione	FDA131230	-		4.227	98.8722	-	24.3367	-	-	-	-	-	-	-	-	-	-	-	-
	Nitazoxanide Analog #1 3,4-diethoxy-N-(5-nitro-1,3-thiazol-2-yl)benzamide	ChemBridge5734630	-		3	98.5768	-	11.3	-	3.6	-	0	-	25	-	-	-	-	-	-
	Calcium acetate	FDA955216	-		-	98.4653	-	0	-	100	-	-	-	-	-	-	-	-	-	-
	methylbenzethonium chloride	FDA131332	-		3.456	97.4238	-	37.67	-	100	-	-	-	-	-	-	-	-	-	-
	niclosamide, NICLOSAMIDE	FDA130212	-		1.1665	97.1698	0.58	91.66	0.41	100	-	100	0.95	100	-	-	67 (10 uM)	100 (10uM) IC50 = 1.3 uM	-	-
	perhexiline maleate	FDA129887	-		7.457	97.1108	-	0	-	47.22	-	-	-	-	-	-	-	-	-	-
	isradipine	FDA130135	-		2.746	97.0641	-	0	-	22.22	-	-	-	-	-	-	-	-	-	-
	benzalkonium chloride	FDA131363	-		1.9	96.9768	-	4.16667	-	100	-	-	-	-	-	-	-	-	-	-
	atovaquone	FDA131510	-		4.155	95.9048	-	12.8	-	83	-	50	-	100	-	-	0 (10uM)	25 (10uM)	-	-
	pyrvinium pamoate	FDA130921	-		0.000316625	95.7616	0.04	83	0.06	100	0.295	100	0.008	100	0.036	100	100 (1uM) and 84 (0.1uM)	100 (1uM and 0.1uM) Day 36/14 day tx	-	-
	Sanguinarine chloride, SANGUINARINE SULFATE	FDA130066	-		6.084	95.228	5.1	81.1	1.1	100	5.6	100	7.5	63	-	100	-	-	-	-
	ciclopirox olamine	FDA130032	-		0.2868	95.1389	-	22.05	-	46.98	-	-	-	-	-	-	-	-	-	-
	hexachlorophene	FDA130837	-		1.7	95.1351	-	51	-	100	-	-	-	-	-	100	-	-	-	-
	securinine	FDA255957	-		-	94.954	-	1.25	-	9.48	-	-	-	-	-	-	-	-	-	-
	gentian violet	FDA130828	-		0.3	93.8502	-	0	-	100	-	-	-	-	-	-	-	-	-	-
	cetylpyridinium chloride	FDA130015	-		3.4	93.7359	-	-	-	-	-	-	-	-	-	-	-	-	-	-
	oxyquinoline, OXYQUINOLINE SULFATE	FDA130732	-		1.5	93.6738	-	38	-	62	-	-	-	-	-	100	-	-	-	-
	alexidine hydrochloride	FDA130116	-		-	92.82	-	22.05	-	100	-	-	-	-	-	-	-	-	-	-
	acriflavinium hydrochloride	FDA130652	-		4.617	92.5832	3.7	65.9	0.94635	96	-	-	-	-	-	-	-	-	-	-
	monensin sodium (monensin a is shown)	FDA131183	-		4.658	91.623	-	27.67	-	0	-	-	-	-	-	-	-	-	-	-
	benzethonium chloride	FDA129994	-		1.4	90.516	-	29.16	-	100	-	87.5	-	-	-	100	-	-	-	-
	Formoterol	FDA285796	-		-	89.8699	-	0	-	100	-	-	-	-	-	-	-	-	-	-
	proflavine hemisulfate	FDA733075	-		-	88.8462	-	38.75	-	9.48	-	-	-	-	-	-	-	-	-	-
	nonoxynol-9	FDA756780	-		3.237	88.7159	-	-	-	-	-	-	-	-	-	100	-	-	-	-
	proscillaridin	FDA756888	-		0.7307	87.9222	-	2.67	-	100	-	-	-	-	-	-	-	-	-	-
	docusate sodium	FDA756919	-		0.2944	87.8446	-	33.35	-	24	-	-	-	-	-	-	-	-	-	-
	broxyquinoline	FDA130655	-		-	87.6737	-	33.75	-	100	-	-	-	-	-	-	-	-	-	-
	iodoquinol	FDA130855	-		1.9	87.5673	131.9	8.3	1	33.3	-	0	-	25	-	84	100 (30uM)	100 (30uM)	-	-
	tolonium chloride	FDA757032	-		-	87.3029	-	0	-	0	-	-	-	-	-	-	-	-	-	-
	tranylcypromine	FDA255659	-		6.15	87.1349	-	18.39	-	20.83	-	-	-	-	-	-	-	-	-	-
	homidium bromide	FDA131380	-		5.426	86.673	-	-	-	-	-	-	-	-	-	-	-	-	-	-
	cloxyquin	FDA130755	-		4.9	86.3585	-	4.16	-	100	-	65	-	-	-	36	-	-	-	-
	nitazoxanide	FDA756827	-		5.77933	84.8238	5.68	81.875	3.21	100	6.7	100	2.36	75	-	-	65 (30 uM)	55 (30 uM) IC50 = 21.8 uM	-	-
	chloroxine	FDA131281	-		0.8027	84.4539	-	0	-	0	-	-	-	-	-	-	-	-	-	-
	avermectin b1, ABAMECTIN (avermectin B1a shown)	FDA130115	-		-	83.2673	-	0	-	9.48	-	-	-	-	-	-	-	-	-	-
	cetrimonium bromide	FDA131280	-		6.163	83.0605	-	30.42	-	100	-	-	-	-	-	-	-	-	-	-
	ethacrynic acid	FDA130672	-		2.6	82.9318	1.94	65.79	3	100	-	100	-	-	-	85	33 (30 uM)	0 (30 uM)	-	-
	phenothiazine	FDA286007	-		-	82.0797	-	0	-	-	-	-	-	-	-	-	-	-	-	-
	bithionol, BITHIONATE SODIUM	FDA130002	-		6.1	81.3243	-	8.33	-	-	-	12.5	-	-	-	76	-	-	-	-
	clioquinol	FDA285750	-		2.613	78.935	25.86	31.04	3.71	100	-	100	-	25	-	-	-	-	-	-
	broxaldine	FDA756965	-		-	78.6714	-	63	-	100	-	-	-	-	-	-	-	-	-	-
	Thioridazine hydrochloride	FDA130958	-		8.084	75.7364	-	2.67	-	0	-	-	-	-	-	-	-	-	-	-
	chlorhexidine, CHLORHEXIDINE HYDROCHLORIDE	FDA130211	-		9.133	75.1394	-	0	-	100	-	-	-	-	-	-	-	-	-	-
	nitroxoline	FDA756968	-		6.699	75.0937	-	36.27	-	69	-	-	-	-	-	-	-	-	-	-
	nisoldipine	FDA285632	-		9.814	74.9395	-	24	-	58.33	-	-	-	-	-	-	-	-	-	-
	piroctone olamine	FDA756713	-		0.88305	72.6242	7.56	58.13	0.997	100	-	100	-	50	-	-	-	-	-	-
	beta-naphthol	FDA756989	-		8.313	69.2035	-	12.18	-	13	-	-	-	-	-	-	-	-	-	-
	isosorbide dinitrate	FDA130039	-		-	69.0462	-	-	-	-	-	-	-	-	-	-	-	-	-	-
	not available	FDA285788	-		-	68.1883	-	-	-	-	-	-	-	-	-	-	-	-	-	-
	disulfiram	FDA130798	-		-	67.0168	-	-	-	-	-	-	-	-	-	-	-	-	-	-
	nitrofurantoin	FDA130717	-		11.64	66.8881	-	19.3367	-	34.72	-	-	-	-	-	-	-	-	-	-
	pregnenolone	FDA130372	-		-	66.2	-	-	-	-	-	-	-	-	-	-	-	-	-	-
	merbromin	FDA756958	-		-	66.0813	-	-	-	-	-	-	-	-	-	-	-	-	-	-
	levamisole hydrochloride	FDA131328	-		-	65.8453	-	4	-	87.5	-	-	-	-	-	-	-	-	-	-
	lincomycin hydrochloride	FDA130687	-		-	64.7829	-	-	-	-	-	-	-	-	-	-	-	-	-	-
	not available	FDA285770	-		-	63.4777	-	-	-	-	-	-	-	-	-	-	-	-	-	-
	neomycin sulfate	FDA131713	-		-	63.2736	-	-	-	-	-	-	-	-	-	-	-	-	-	-
	not available	FDA285837	-		-	62.9313	-	-	-	-	-	-	-	-	-	-	-	-	-	-
	hydroflumethiazide	FDA130846	-		-	62.4912	-	-	-	-	-	-	-	-	-	-	-	-	-	-
	methylthiouracil	FDA130878	-		-	61.6444	-	-	-	-	-	-	-	-	-	-	-	-	-	-
	nifuroxazide	FDA255816	-		-	61.5544	-	-	-	-	-	-	-	-	-	-	-	-	-	-
	not available	FDA955201	-		-	60.9487	-	-	-	-	-	-	-	-	-	-	-	-	-	-
	oxidopamine hydrochloride	FDA130226	-		-	59.2292	-	-	-	-	-	-	-	-	-	-	-	-	-	-
	tuaminoheptane sulfate	FDA130600	-		-	59.0911	-	-	-	-	-	-	-	-	-	-	-	-	-	-
	thiram	FDA131347	-		-	58.8997	-	-	-	-	-	-	-	-	-	-	-	-	-	-
	tenylidone	FDA757039	-		-	58.52	-	-	-	-	-	-	-	-	-	-	-	-	-	-
	moxidectin	FDA756757	-		-	58.3139	-	-	-	-	-	-	-	-	-	-	-	-	-	-
	Niclosamide Analog #2 3,5-dichloro-N-(2-chloro-4-nitrophenyl)-2-hydroxybenzamide	ChemBridge7660547	-		0.8	57.7503	4.574	100	1.2	100	3.3	100	0.30365	-	-	-	-	-	-	-
	phensuccimide	FDA756748	-		-	57.7451	-	-	-	-	-	-	-	-	-	-	-	-	-	-
	dichlorvos	FDA131606	-		-	56.8452	-	-	-	-	-	-	-	-	-	-	-	-	-	-
	benzoxiquine	FDA735781	-		-	56.6132	-	-	-	-	-	-	-	-	-	-	-	-	-	-
	Bepridil hydrochloride	FDA131511	-		-	56.554	-	-	-	-	-	-	-	-	-	-	-	-	-	-
	deferoxamine mesylate	FDA130771	-		-	56.4339	-	-	-	-	-	-	-	-	-	-	-	-	-	-
	eprinomectin	FDA756836	-		3.7	56.3632	-	0	-	22.22	-	-	-	-	-	-	-	-	-	-
	not available	FDA955232	-		-	56.1699	-	-	-	-	-	-	-	-	-	-	-	-	-	-
	nimesulide	FDA131322	-		-	56.0218	-	-	-	-	-	-	-	-	-	-	-	-	-	-
	lufenuron	FDA735770	-		-	55.9758	-	-	-	-	-	-	-	-	-	-	-	-	-	-
	chlorambucil	FDA130016	-		-	55.5824	-	-	-	-	-	-	-	-	-	-	-	-	-	-
	ascorbyl palmitate	FDA756762	-		-	54.6272	-	-	-	-	-	-	-	-	-	-	-	-	-	-
	eucatropine hydrochloride	FDA130674	-		-	54.425	-	-	-	-	-	-	-	-	-	-	-	-	-	-
	not available	FDA957535	-		-	53.491	-	-	-	-	-	-	-	-	-	-	-	-	-	-
	norethindrone acetate	FDA130262	-		-	53.3297	-	-	-	-	-	-	-	-	-	-	-	-	-	-
	hydrocortisone valerate	FDA735786	-		-	53.3293	-	-	-	-	-	-	-	-	-	-	-	-	-	-
	olsalazine sodium	FDA756788	-		-	53.187	-	-	-	-	-	-	-	-	-	-	-	-	-	-
	dequalinium chloride	FDA129955	-		-	52.3016	-	48.6607	-	86.6667	-	-	-	-	-	-	-	-	-	-
	clofazimine	FDA255714	-		35.81	51.0258	-	35.42	-	0	-	-	-	-	-	-	-	-	-	-
	not available	FDA285733	-		-	51.0228	-	-	-	-	-	-	-	-	-	-	-	-	-	-
	Pentamidine isethionate	FDA130651	-		-	49.6275	-	-	-	-	-	-	-	-	-	-	-	-	-	-
	ioversol	FDA756926	-		-	49.5938	-	-	-	-	-	-	-	-	-	-	-	-	-	-
	(-)-Physostigmine, PHYSOSTIGMINE SALICYLATE	FDA130205	-		13.58	47.1167	-	5.42	-	9.48	-	-	-	-	-	-	-	-	-	-
	dantron, DANTHRON	FDA131591	-		18.26	38.2581	-	-	-	-	-	-	-	-	-	72	-	-	-	-
	riboflavin	FDA735546	-		16.03	36.2295	-	7.83	-	45	-	-	-	-	-	10	-	-	-	-
	** A. ceylanicum and T. muris rated on a scale where 0 = dead, 3 = fully motile

## Sheet: Table S3 FINAL
Supplementary Table S3: Motility, viability and molting assays across multiple nematode parasite species for the expanded set of Azole compounds
SMDC ID	Compound name	Brugia Adult Females Day 3 IC50 (uM)	Brugia Adult Females Day 3 % inhib at 10 uM	O. ochengi Adult Female Day 7 IC50 (uM)	O. ochengi Adult Female Day 7 % inhib at 10 uM	O. ochengi Adult Male Day 5 IC50 (uM)	O. ochengi Adult Male Day 5 % inhib at 10 uM	L. loa mf Day 5 IC50 (uM)	L. loa mf Day 5 % inhib at 10 uM	O. ochengi mf Day 5 IC50 (uM)	O. ochengi mf Day 5 % inhib at 10 uM	O. volvulus L3 Day 6 molting IC50 (uM)	O. volvulus L3 Day 6 molting % inhib at 10 uM	O. volvulus L5 % inhibition of motility (conc.)	O. volvulus L5 MTT % inhibition of viability (conc.)
FDA915036	Sertaconazole nitrate		100		21		31
FDA131151	econazole nitrate	4	100		22		26
reF379	Fenticonazole	1.154	100	94.65	32	10.61	75	10 (dil. blood)	50		18			4.657 IC50 Day 21	0% @ 0.3 uM on Day 29
reF333	Isoconazole	3.8 on Day 2	100	30.8	57	0.55	100	10 (dil. blood)	33.3		37.5			2.381 IC50 Day 21	17% @ 0.3 uM on Day 29
FDA735884	tioconazole	3.2	99		14		100
FDA131127	sulconazole nitrate	4.6	98		26		99
FDA130708	miconazole nitrate	3.3	96		0		100				0		100
reF715	Posaconazole	0.1	82	>100 uM	38	6.06	79	>100 (dil. Blood)			75			57% @ 1 uM on Day 28	0% @ 10 uM on Day 29
FDA131180	clotrimazole	5.5	85		8		100				0		82
FDA915021	Itraconazole		80		13		21
FDA756979	chlormidazole		67
FDA130871	methimazole		46
FDA93719	succinylsulfathiazole		43
FDA285932	oxiconazole nitrate		41
FDA131087	fenbendazole		39
FDA131400	lansoprazole		36
FDA99068	metronidazole		31
FDA285641	bifonazole		24
FDA285825	oxfendazole		19
FDA130943	sulfamethoxazole		19
FDA756735	dexlansoprazole		17
FDA131386	albendazole		14
FDA255976	phthalylsulfathiazole		10
FDA255785	omeprazole		10
FDA756782	enilconazole		9
FDA131205	cefmetazole sodium		9
FDA735867	sulfisoxazole acetyl		8
FDA131099	mebendazole		6
FDA131133	ronidazole		5
FDA285797	pantoprazole		4
FDA285847	secnidazole		4
FDA756904	voriconazole		3
FDA131353	oxybendazole, OXIBENDAZOLE		3
FDA130946	sulfathiazole		3
FDA757006	climbazole		2
FDA756864	aripiprazole		2
FDA756792	terconazole		1
FDA129900	thiabendazole		0
FDA130683	ketoconazole		0
FDA756886	butoconazole		0
FDA131417	fluconazole		0
FDA129922	aminothiazole		0
FDA130248	pentetrazole, PENTYLENETETRAZOL		0
FDA130948	sulfisoxazole		0
FDA131122	Sulfaphenazole		0
FDA255658	ornidazole		0
FDA285877	rabeprazole sodium		0
FDA731140	procodazole		0
